1 Genetic analyses led to the discovery of a super-active mutant of the RNA  
2 polymerase I

3  
4 Tommy Darrière<sup>1</sup>, Michael Pils<sup>2</sup>, Marie-Kerguelen Sarthou<sup>1</sup>, Adrien Chauvier<sup>1</sup>, Titouan  
5 Genty<sup>1</sup>, Sylvain Audibert<sup>1</sup>, Christophe Dez<sup>1</sup>, Isabelle Léger-Silvestre<sup>1</sup>, Christophe Normand<sup>1</sup>,  
6 Anthony K. Henras<sup>1</sup>, Marta Kwapisz<sup>1</sup>, Olga Calvo<sup>3</sup>, Carlos Fernández-Tornero<sup>4</sup>, Herbert  
7 Tschochner<sup>2</sup> and Olivier Gadal<sup>1\*</sup>

8  
9  
10 <sup>1</sup>Laboratoire de Biologie Moléculaire Eucaryote, Centre de Biologie Intégrative (CBI),  
11 Université de Toulouse, CNRS, UPS, Toulouse, France

12 <sup>2</sup>Universität Regensburg, Biochemie-Zentrum Regensburg (BZR), Lehrstuhl Biochemie III,  
13 Regensburg, Germany

14 <sup>3</sup>Instituto de Biología Funcional y Genómica, IBFG-CSIC, Universidad de Salamanca,  
15 Salamanca, Spain

16 <sup>4</sup>Centro de Investigaciones Biológicas, CSIC, Madrid, Spain

17

18

19

20

21

22

23

24 \* Corresponding author

25 Email: [olivier.gadal@ibcg.biotoul.fr](mailto:olivier.gadal@ibcg.biotoul.fr) (OG)

1 **Abstract:**

2 Most transcriptional activity of exponentially growing cells is carried out by the RNA  
3 Polymerase I (Pol I), which produces a ribosomal RNA (rRNA) precursor. In budding yeast,  
4 Pol I is a multimeric enzyme with 14 subunits. Among them, Rpa49 forms with Rpa34 a Pol  
5 I-specific heterodimer (homologous to PAF53/CAST heterodimer in human Pol I), which  
6 might be responsible for the specific functions of the Pol I. Previous studies provided insight  
7 in the involvement of Rpa49 in initiation, elongation, docking and releasing of Rrn3, an  
8 essential Pol I transcription factor. Here, we took advantage of the spontaneous occurrence of  
9 extragenic suppressors of the growth defect of the *rpa49* null mutant to better understand the  
10 activity of Pol I. Combining genetic approaches, biochemical analysis of rRNA synthesis and  
11 investigation of the transcription rate at the individual gene scale, we characterized mutated  
12 residues of the Pol I as novel extragenic suppressors of the growth defect caused by the  
13 absence of Rpa49. When mapped on the Pol I structure, most of these mutations cluster  
14 within the jaw-lobe module, at an interface formed by the lobe in Rpa135 and the jaw made  
15 up of regions of Rpa190 and Rpa12. *In vivo*, the suppressor allele *RPA135-F301S* restores  
16 normal rRNA synthesis and increases Pol I density on rDNA genes when Rpa49 is absent.  
17 Growth of the Rpa135-F301S mutant is impaired when combined with exosome mutation  
18 *rrp6Δ* and it massively accumulates pre-rRNA. Moreover, Pol I bearing Rpa135-F301S is a  
19 hyper-active RNA polymerase in an *in vitro* tailed-template assay. We conclude that wild-  
20 type RNA polymerase I can be engineered to produce more rRNA *in vivo* and *in vitro*. We  
21 propose that the mutated area undergoes a conformational change that supports the DNA  
22 insertion into the cleft of the enzyme resulting in a super-active form of Pol I.

23

1 **Author summary:**

2 The nuclear genome of eukaryotic cells is transcribed by three RNA polymerases. RNA  
3 polymerase I (Pol I) is a multimeric enzyme specialized in the synthesis of ribosomal RNA.  
4 Deregulation of the Pol I function is linked to the etiology of a broad range of human  
5 diseases. Understanding the Pol I activity and regulation represents therefore a major  
6 challenge. We chose the budding yeast *Saccharomyces cerevisiae* as a model, because Pol I  
7 transcription apparatus is genetically amenable in this organism. Analyses of phenotypic  
8 consequences of deletion/truncation of Pol I subunits-coding genes in yeast indeed provided  
9 insights into the activity and regulation of the enzyme. Here, we characterized mutations in  
10 Pol I that can alleviate the growth defect caused by the absence of Rpa49, one of the subunits  
11 composing this multi-protein enzyme. We mapped these mutations on the Pol I structure and  
12 found that they all cluster in a well-described structural element, the jaw-lobe module.  
13 Combining genetic and biochemical approaches, we showed that Pol I bearing one of these  
14 mutations in the Rpa135 subunit is able to produce more ribosomal RNA *in vivo* and *in vitro*.  
15 We propose that this super-activity is explained by structural rearrangement of the Pol I  
16 jaw-lobe interface.

17

## 1 **Introduction**

2 The nuclear genome of eukaryotic cells is transcribed by three RNA polymerases [1]. RNA  
3 polymerase II (Pol II) transcribes most of the genome and is responsible for all messenger  
4 RNA production. RNA polymerases III and I are specialized in the synthesis of a limited  
5 number of transcripts. RNA polymerase III (Pol III) produces small structured RNAs,  
6 including tRNAs and the 5S ribosomal RNA. RNA polymerase I (Pol I) produces a single  
7 transcript, the large polycistronic precursor (35S pre-rRNA in yeast; 47S in human), which  
8 constitutes the first step of ribosome biogenesis. Pre-rRNA is then processed by multiple  
9 successive steps into the mature rRNAs (25S, 18S, and 5.8S in yeast; 28S, 18S and 5.8S in  
10 human). Despite producing a single transcript, Pol I is by far the most active eukaryotic RNA  
11 polymerase, responsible for up to 60% of the total transcriptional activity in exponentially  
12 growing cells [2]. The strongly transcribed rRNA genes can be visualized using the DNA  
13 spread method developed by Miller *et al*, 1969, in which the 35S rRNA genes (rDNA) exhibit  
14 a “Christmas tree” configuration, with up to 120 polymerases per transcribed gene [3].

15 The full subunit composition and structural data are now available for the three nuclear RNA  
16 polymerases of the budding yeast *Saccharomyces cerevisiae* [4,5][6,7]. Pol I contains a core  
17 of shared or homologous subunits that are largely conserved in eukaryotes and archaea, as for  
18 the other two nuclear RNA polymerases [8]. The two largest subunits (Rpa190 and Rpa135)  
19 form the DNA-binding cleft that carries the catalytic center. Rpb5, Rpb6, Rpb8, Rpb10, and  
20 Rpb12 are shared with Pol II and Pol III, whereas Rpc40 and Rpc19 are only shared with Pol  
21 III. This nine-subunit core is associated with the stalk, a structure formed in Pol I by the  
22 heterodimeric complex Rpa43/Rpa14, which is involved in docking the essential Rrn3  
23 initiation transcription factor to the enzyme [9–12]. The Pol I-Rrn3 complex interacts with  
24 promoter bound factors, the core factor (CF), forming the initially transcribing complex (ITC)  
25 [13–16]. Additionally, Pol I and Pol III contain subunits that are functionally and structurally

1 related to Pol II-specific basal transcription factors, called the "Built-in Transcription Factors"  
2 [17–19]. Their presence in Pol I and Pol III results in a higher number of subunits, from 12  
3 subunits in Pol II, to 14 and 17 for Pol I and Pol III respectively, and correlates with  
4 substantial transcript production from a few genes [8]. The heterodimer formed by Rpa34 and  
5 the N-terminal domain of Rpa49 (Rpa49Nt) in Pol I (equivalent to Rpc53 and Rpc37 in Pol  
6 III) is related to the basal transcription factor TFIIF, and stimulates endogenous transcript  
7 cleavage activity [18,20,21]. Rpc34 in Pol III and the Rpa49 C-terminal domain (Rpa49Ct)  
8 bear a tandem winged helix domain similar to TFIIE, also named A49tWH [18,20]. Rpa49Ct  
9 binds upstream DNA [15,22] and is involved in initiation and elongation [18,23]. Finally,  
10 Rpa12 in Pol I and Rpc11 in Pol III harbour a C-terminal domain involved in stimulating  
11 endogenous transcript cleavage activity, similar to that of TFIIS for Pol II [17,24].

12 Yeast genetic studies of Pol III and Pol I "Built-in Transcription Factors" have revealed  
13 striking differences, despite their clear similarities. Each Pol III subunit is essential, but none  
14 of the Pol I "Built-in Transcription Factors" is required for cell growth. Lack of Rpa34 or  
15 invalidation of Rpa49Nt, by removing the TFIIF-like heterodimer, has no effect on growth *in*  
16 *vivo* [18,25,26]. In contrast, full or C-terminal deletion of *RPA49* leads to a strong growth  
17 defect at all temperatures, which is more severe below 25°C [18,26,27]. Full deletion of  
18 *RPA12* leads to a strong growth defect at 25 and 30°C, and is lethal at higher temperatures  
19 [28]. Lack of the C-terminal extension of Rpa12 abolishes stimulation of intrinsic cleavage,  
20 without any detectable growth defect [17,24]. Finally, yeast strains carrying the triple deletion  
21 of *RPA49*, *RPA34* and *RPA12* are viable, but accumulate the growth defects associated with  
22 each of the single mutants [25].

23 Pol I is functional in the absence of Rpa49, but shows well-documented initiation and  
24 elongation defects, both *in vivo* and *in vitro* [23,26,27,29–31]. Restoration of active rRNA  
25 synthesis, in the absence of Rpa49, has been used to identify factors involved in initiation and

1 elongation, such as Hmo1 and Spt5 [26,30,32]. Here, we made use of the spontaneous  
2 occurrence of extragenic suppressors of the growth defect of the *rpa49* null mutant [27] to  
3 better understand the activity of Pol I. We showed that the suppressing phenotype was caused  
4 by specific point mutations in the two largest Pol I subunits, Rpa190 and Rpa135. We  
5 identified a small area around Phe301 in subunit Rpa135, at an interface formed by the lobe in  
6 Rpa135 and the jaw made up of regions of Rpa190 and Rpa12, where most mutations cluster.  
7 Characterizing the Rpa135-F301S allele, we showed in an *in vitro* assay, that such Pol I  
8 mutant is more active than the wild-type enzyme. *In vivo*, overproduction of rRNA by Pol I  
9 bearing the Rpa135-F301S mutation was observed in backgrounds where the nuclear  
10 exosome activity is impaired by *RRP6* deletion.

11

## 1 **Results**

### 2 **Isolation of extragenic suppressor mutants of the growth defect in absence of Rpa49**

3 We characterized extragenic suppressors of the *RPA49* deletion to better understand how cell  
4 growth is achieved in the absence of Rpa49. *RPA49* full-deletion mutants show a strong  
5 growth defect at 30°C and are unable to grow at 25°C. However, spontaneous suppressors  
6 have been previously observed [27]. We quantified the frequency of occurrence of individual  
7 clones able to grow at 25°C. There was a low frequency of colony occurrence, comparable  
8 with the spontaneous mutation rate of a single control gene (*CANI*;  $< 5 \cdot 10^{-6}$ ). We isolated  
9 more suppressors after irradiating the cells with UV light. UV irradiation, resulting in a  
10 survival rate of about 50%, increased the frequency of suppressor mutations by approximately  
11 10-fold. We identified clones that grew at 25°C after three days and selected individual  
12 colonies, called SGR for Suppressor of Growth Defect of *RPA49* deletion, with various  
13 growth rates. We ranked SGR from 1 to 186 based on their growth rates at 25°C; *SGR1* had a  
14 growth rate comparable to the wild-type (WT) condition (Fig. 1A). We crossed the 186 SGR  
15 clones with a strain of the opposite mating type bearing the deletion of *RPA49* to obtain  
16 diploid cells homozygous for the *RPA49* deletion and heterozygous for each suppressor. The  
17 restoration of growth of the diploids at 25°C showed that all suppressor phenotypes obtained  
18 were fully or partially dominant. We focused on the most efficient suppressor clones, *SGR1*  
19 and *SGR2*, and performed tetrad analysis to follow segregation of the observed suppression  
20 phenotype. Each suppressor phenotype was linked to a single locus in the genome and SGR  
21 mutants had no strong growth defect (*SGR1* in Fig. 1A). We used global genomic mapping of  
22 *SGR1* and *SGR2*, derived from "genetic interaction mapping" (GIM) methods [33] (Materials  
23 and Methods; S1 Fig), and found a genomic linkage with genes encoding the two largest Pol I  
24 subunits: *RPA135* for *SGR1* and *RPA190* for *SGR2* (S1 Fig). Sequencing of the genomic  
25 DNA revealed that *SGR1* bears a double mutation, whereas *SGR2* bears a single one

1 (*RPA135-I218T/R379K* and *RPA190-A1557V* alleles, respectively). Furthermore, we  
2 identified an additional mutant, SGR3, in *RPA135* (*RPA135-R305L*). The heterogeneity of the  
3 growth induced by strong UV mutagenesis prevented suppressor cloning from the 183 other  
4 SGR clones.

5 We next used the dominant phenotype of these suppressors to isolate more alleles, which  
6 suppress the deletion phenotype of *RPA49* in *RPA190* and *RPA135*. We constructed a library  
7 of randomly generated mutants (see Materials and Methods) by propagating plasmids bearing  
8 WT *RPA135* or *RPA190* in a mutagenic *E. coli* strain. After phenotypic selection of *rpa49Δ*  
9 mutants bearing a mutagenized Rpa190 or Rpa135 subunit at 25°C, each plasmid bearing a  
10 suppressor allele was extracted, sequenced, and re-transformed into yeast to confirm the  
11 suppressor phenotype. We thus isolated nine novel alleles of *RPA190* and thirteen of *RPA135*  
12 that were able to restore growth of *rpa49* deletion mutant at 25°C (S1 Table). We evaluated  
13 the suppression strength based on growth restoration relative to WT at 25°C, as for the SGR  
14 strains. Suppressor alleles obtained by mutagenesis of *RPA190* or *RPA135*, more effective  
15 than SGR1, 2, or 3 were identified (S1 Table). In conclusion, we identified 22 novel alleles of  
16 genes coding for the two largest Pol I subunits as extragenic suppressors of the *rpa49Δ*-  
17 associated growth defect.

### 18 ***rpa190* and *rpa135* mutant alleles can bypass the need of *RPA49* for optimal growth**

19 The growth of the strains bearing one of six suppressor alleles (*RPA190-E1274K*, *RPA190-*  
20 *C1493R*, *RPA190-L1262P*, *RPA135-R379G*, *RPA135-Y252H*, and *RPA135-F301S*) was  
21 evaluated by a 10-fold dilution test (Fig. 1B), showing significant suppression by all in the  
22 absence of Rpa49. In previous genetic studies, other genetic backgrounds that alleviate the  
23 growth defect of *rpa49Δ* at 25°C were isolated: *rpa43-35,326* [26], decreased rDNA copy  
24 number [29], Hmo1 over-expression [30], or Spt5 truncations [32]. For all these mutants,  
25 rRNA synthesis was only partially restored in the absence of Rpa49 and significant



1 transcription defects remained. Here, we focused on the *RPA135-F301S* allele, the most  
2 effective growth suppressor of the *RPA49* deletion: the *rpa49Δ RPA135-F301S* double mutant  
3 grew almost as well at 25°C as the WT strain (Fig. 1B).

4 We sought further insight into the effect of the suppressors by integrating the *RPA135-F301S*  
5 point mutation into the endogenous gene in three genetic backgrounds: WT, *rpa49Δ* (full  
6 deletion), or *rpa49ΔCt*. Note that yeast bearing *rpa49ΔCt* or *rpa49Δ* full-deletion have a  
7 similar growth defect, but have different Pol I subunits composition [26,27]. In the absence of  
8 Rpa49, Rpa34 does not associate with transcribing Pol I while in strains bearing the *rpa49ΔCt*  
9 allele, Rpa34 and Rpa49Nt remain associated with the polymerase [26,27]. The growth rate  
10 was determined in each of these yeast strains at 30°C, in the presence or absence of *RPA135-*  
11 *F301S*. The suppressor allele *RPA135-F301S* had no effect on growth in the WT strain  
12 (doubling time of 102 min). The doubling time was 180 min for the *rpa49Δ* strain and  
13 *RPA135-F301S* restored growth to a doubling time of 135 min. We observed similar  
14 suppression on the *rpa49ΔCt* background.

### 15 **Most suppressors mutations are clustered in the jaw-lobe module**

16 Structural data are now available for Pol I in an inactive form [4,5], in complex with Rrn3  
17 [12,23,34], associated with other initiation factors [13–15], in elongating forms [22,35], and  
18 in the paused state [36](Fig. 2A). We mapped Rpa135 and Rpa190 residues that suppress the  
19 growth defect of the mutant strain *rpa49Δ* onto the structure of WT Pol I in which the full  
20 structure of Rpa49 was determined [15] (Fig. 2B). Most of the suppressor mutations, which  
21 provided growth recovery (S1 table), appeared to be clustered at a specific interface between  
22 the two largest subunits, Rpa190 and Rpa135 (Fig. 2B), between the lobe (Rpa135 - salmon)  
23 and the jaw (Rpa190 - blue). In *RPA135*, we found five suppressor mutations, which modify a  
24 small region of 60 residues within the lobe domain (S2 Fig). Note that in this region, three  
25 amino acids "DSF" (D299, S300, F301), which are conserved among eukaryotic species, are

1 all mutated in suppressors (S2 Fig). Substituted residues likely result in destabilization of this  
2 interface, suggesting a specific rearrangement of the interface lobe/jaw in each mutant. The  
3 jaw is also characterized by the presence of a  $\beta$ -strand in the structure of Rpa12 (Rpa12 -  
4 yellow: residues 46-51, Fig. 2B) that, along with four  $\beta$ -strands in Rpa190, forms a five-  
5 stranded anti-parallel  $\beta$ -sheet. The Rpa12  $\beta$ -strand faces the Rpa135 lobe domain (residue 252  
6 to 315 of Rpa135 - salmon), in which six independent mutations were found, including  
7 *RPA135-F301S*.

8 To evaluate the implication of Rpa12 in suppression, we then tested whether mutated alleles  
9 of *RPA12* could behave as suppressors. We generated a library of randomly mutagenized  
10 *RPA12*, and screen for *RPA12* alleles able to correct *rpa49 $\Delta$*  growth defect at 25°C. Two  
11 dominant alleles (*RPA12-S6L* and *RPA12-T49A*) indeed efficiently suppressed the growth  
12 defect of *rpa49 $\Delta$*  and of *rpa49 $\Delta$ Ct* (Fig. 2D, not shown here for *rpa49 $\Delta$ Ct*). *RPA12-S6L* and  
13 *RPA12-T49A* obtained by random mutagenesis are specifically located in the "hotspot" at the  
14 jaw/lobe interface. Threonine 49 of Rpa12 is located on the  $\beta$ -strand (Fig. 2C), facing residues  
15 D299, S300, and F301 of Rpa135, and Rpa190-E1274 (Fig. 2B). The second mutation,  
16 *RPA12-S6L*, is located in the N-terminal domain of Rpa12 (Fig. 2C).

17 In conclusion, all point mutations in Rpa190, Rpa135, and Rpa12 detected in the hotspot  
18 domain of the jaw/lobe interface substitute for *RPA49* *in vivo*.

19

20 **Pol I bearing Rpa135-F301S or Rpa12-S6L restores efficient rRNA synthesis and Pol I**  
21 **occupancy on rRNA genes in the absence of Rpa49Ct *in vivo***

22 We used yeast mutant cells with a low (about 25 copies, +/- 3 copies) and stabilized (*fob1 $\Delta$* )  
23 number of rDNA repeats to better associate the growth phenotype of *RPA135-F301S* or

1 *RPA12-S6L* allele to rRNA synthesis activity and Pol I density on transcribed genes *in vivo*.  
2 This genetic background is the best suited to study variations in the number of polymerase  
3 molecules per rRNA gene because it has a low number of rDNA copies, almost all in the  
4 active state with a very high Pol I loading rate [29,37,38]. We generated five strains in this  
5 low copy background (bearing single mutations; *rpa49ΔCt*, *RPA135-F301S*, *RPA12-S6L* and  
6 double mutants combining *rpa49ΔCt* with *RPA135-F301S* or *RPA12-S6L* alleles) and  
7 determined their doubling time (Fig. 3A) and *de novo* synthesis of rRNA (Fig. 3B). Note that  
8 rDNA copies number is similar between strains, as indicated by chromosome XII size in  
9 pulse-field gel electrophoresis (S3 Fig). The presence of the *RPA135-F301S* allele in Pol I  
10 effectively compensated the growth defect caused by the absence of C-terminal part of Rpa49  
11 in this background.

12 Labelling of the nascent rRNA was performed using a 2-min pulse with <sup>3</sup>H adenine. We  
13 performed the labelling in three independent cultures because of heterogeneity due to random  
14 occurrence of suppressors in cell cultures of the *rpa49ΔCt* mutant. When compared to a WT  
15 strain, RNA precursors synthesis was reduced approximately five-fold for *rpa49ΔCt*, even  
16 under permissive conditions (30°C) (compare Fig. 3B, lane 1 to lanes 2 to 4). Pol I activity in  
17 the presence of *RPA135-F301S*, with or without Rpa49Ct, was similar to that of the WT  
18 enzyme (Fig. 3B, lane 5 and 6). Similarly, *RPA12-S6L* partially restored Pol I activity in the  
19 absence of Rpa49Ct (compare Fig. 3B, lanes 7 and 8). Thus, *RPA135-F301S* and *RPA12-S6L*  
20 appeared to largely restore rRNA production in the absence of C-terminal part of Rpa49.

21 To get insight in Pol I activity in suppressors strains, we combined the rRNA synthesis  
22 quantification with the analysis of the Pol I distribution along the rRNA genes. We evaluated  
23 Pol I density on transcribed genes by performing Miller spreads, the only technique that  
24 currently allows the counting of individual Pol I molecules on a single rRNA genes [3,29].  
25 Using Miller spreads, we previously showed that full deletion of *rpa49* resulted in a three-fold

1 decrease of Pol I density per gene [3,29]. We show here that strain expressing the *rpa49ΔCt*  
2 allele results in a four-fold decrease of Pol I density per gene, with about 21 Pol I detected per  
3 gene, as compared to about 91 detectable in WT condition (Fig. 2C). Expression of the  
4 *RPA135-F301S* or *RPA12-S6L* allele, WT for *RPA49*, had no detectable influence on Pol I  
5 density (Fig. 3C, *RPA135-F301S* and not shown). In contrast to strain *rpa49ΔCt*, double  
6 mutant *rpa49ΔCt RPA135-F301S* or *rpa49ΔCt RPA12-S6L* showed significantly higher Pol I  
7 occupancy (46 and 43 respectively instead of 21 Pol I molecules per gene). Using ChIP, we  
8 reproduced that Pol I occupancy in absence of Rpa49Ct is drastically reduced [26]. We  
9 confirmed Miller spread quantification, in which *RPA135-F301S* significantly increased Pol I  
10 occupancy in absence of Rpa49Ct, although not to WT level (Fig. 3D).

11  
12 Overall, these results show that the presence of the *RPA135-F301S*, or to a lesser extend  
13 *RPA12-S6L* allele, in a strain lacking C-terminal part of Rpa49 restores rRNA synthesis to  
14 WT levels. However, Pol I density on rRNA genes is only partly restored, indicative of an  
15 improved transcription initiation, or increased stability of elongating Pol I in absence of  
16 Rpa49Ct.

### 17 **Genetic interplay between suppressors alleles and Pol I domains**

18 Extensive genetic characterization of Pol I subunits together with recent structural analysis  
19 have provided insight in their involvement in catalytic steps (initiation, pause release or  
20 termination). To investigate suppression mechanism, we then decided to explore which  
21 domains or subunits of Pol I are required for the suppression to occur. We tested deletion of  
22 *RPA14*, *RPA34* or *RPA12*, and of *RPA190* alleles (*rpa190Δloop*) coding for Rpa190 lacking  
23 specific domain. The structure of Rpa190 revealed the presence of an extended loop inside the  
24 DNA-binding cleft folded in a "expander/DNA mimicking loop" conformation when Pol I is  
25 in an inactive, dimeric form [4,5]. This loop is inserted in the jaw domain of Rpa190 (Fig.

1 2B), in the vicinity of the mutation hotspot. A small deletion of this Rpa190 domain (1361-  
2 1390) resulted in a slight slow-growth phenotype [4]. We generated a larger deletion allele,  
3 *rpa190 $\Delta$ loop* (deletion of residues 1342-1411 of Rpa190), and observed no associated growth  
4 defect (Fig. 4A). We were unable to generate a viable double mutant when combining this  
5 mutation with the *rpa49* full deletion. Thus, the DNA-mimicking loop is required for Pol I  
6 activity in the absence of Rpa49. We next tested whether deletion of this loop influences the  
7 suppression by the *RPA135-F301S* allele. Note that the *rpa190 $\Delta$ loop* combined with *RPA135-*  
8 *F301S* had no growth phenotype. There was no difference in the growth of the *rpa49 $\Delta$*   
9 *RPA135-F301S* double mutant and that of the triple mutant *rpa49 $\Delta$  RPA135-F301S*  
10 *rpa190 $\Delta$ loop* (Fig. 4A). Thus, the expander/DNA mimicking loop of Rpa190 is not required  
11 for suppression, but is required for the viability of the *rpa49* deletion mutant.

12 Rpa34 forms a heterodimer with Rpa49Nt, and Rpa14 is essential in absence of Rpa49. We  
13 then introduced *RPA135-F301S* in yeast strains lacking either Rpa34 or Rpa14 (Fig. 4B and  
14 C). Growth of *RPA135-F301S/rpa34 $\Delta$*  and *RPA135-F301S/rpa14 $\Delta$*  double mutants were not  
15 different from that of the single mutants. However, *RPA135-F301S* suppressed the growth  
16 defect of the viable double mutant, *rpa34 $\Delta$  rpa49 $\Delta$*  (Fig. 4B). The double deletion mutant  
17 lacking both Rpa49 and Rpa14 was not viable [25]. Introduction of the suppressor *RPA135-*  
18 *F301S*, by genetic crossing, resulted in a triple mutant (*rpa14 $\Delta$  rpa49 $\Delta$  RPA135-F301S*) that  
19 could grow, but slower than WT (Fig. 4C). We conclude that *RPA135-F301S* does not require  
20 Rpa14 or Rpa34 for the suppression to occur.

21 We next evaluated which part of Rpa12 subunit was required for the suppression to occur  
22 (Fig. 5). First, we evaluated growth of *rpa12* alleles when combined with *rpa49* deletion. The  
23 C-terminal region of Rpa12 (TFIIS-like) is inserted towards the active center of Pol I to  
24 stimulate intrinsic cleavage activity but is displaced during productive initiation and  
25 elongation steps. C-terminal deletion of Rpa12 resulted in normal growth [24] (Fig. 5A- lane

1 2), although the *rpa12 $\Delta$ Ct* allele is unable to stimulate cleavage activity *in vitro* [17]. Full  
2 deletion of *RPA12* led to a heterogeneous growth phenotype when propagated at 30°C. To  
3 overcome this heterogeneity, we constructed a strain with *RPA12* under the control of the  
4 regulatable pGAL promoter. Depletion of Rpa12 on glucose containing medium, like full  
5 *RPA12* deletion, resulted in a slight growth defect at 25°C, which was stronger at 30°C [28]  
6 (Fig. 5A-lane 3). In contrast, *RPA49* deletion resulted in a growth defect at 30°C, which was  
7 stronger at 25°C [27] (Fig. 5A-lane 4). Combining *rpa12 $\Delta$ Ct* with *rpa49 $\Delta$*  resulted in a mild  
8 synergistic phenotype, with a stronger growth defect at both 25°C and 30°C (Fig. 5A - lane  
9 5). The double mutant lacking both full Rpa12 and Rpa49 subunits was viable, but had a  
10 major growth defect [25] (Fig. 5A - lane 6).

11 Secondly, in double *rpa12/rpa49* mutants, we tested the expression of the suppressors alleles,  
12 which were isolated (*RPA12-S6L*, *RPA12-T49A* or *RPA135-F301S*). We explored whether the  
13 C-terminal extension of Rpa12 was necessary for suppression of the *rpa49 $\Delta$*  phenotype. We  
14 introduced the Rpa12 C-terminal truncation into the strain bearing both *rpa49 $\Delta$*  and  
15 suppressor alleles *RPA12-S6L* or *RPA12-T49A*. *RPA12-S6L* and *RPA12-S6L- $\Delta$ Ct* resulted in  
16 similar suppression of the *rpa49 $\Delta$*  growth defect (Fig. 5B). *RPA12-T49A* or *RPA12-T49A- $\Delta$ Ct*  
17 also suppressed equivalently (data not shown). We then introduced the *RPA135-F301S* allele  
18 in strains lacking Rpa49 with or without the entire Rpa12 subunit and assessed the  
19 suppression phenotype at 25°C (Fig. 5C). The growth defect of *rpa49 $\Delta$*  was completely  
20 suppressed by the *RPA135-F301S* allele when Rpa12 was expressed (Fig. 5C, left panel),  
21 whereas suppression mediated by *RPA135-F301S* was not detected in the absence of Rpa12  
22 (Fig. 5C, middle panel). After 10 days, *rpa49 $\Delta$  rpa12 $\Delta$*  double mutant behaved exactly the  
23 same with or without the *RPA135-F301S* allele, demonstrating that suppressor allele has no  
24 effect in absence of Rpa12 (Fig. 5C, right panel).

1 In conclusion, we show that *RPA135-F301S* suppression of *rpa49Δ*-associated growth defect  
2 does not require Rpa190 DNA mimicking loop, Rpa34, or Rpa14. Rpa12 C-terminal portion  
3 involved in stimulating cleavage activity is also not required for suppression. In contrast,  
4 Rpa12 N-terminal domain is required for the suppression to occur.

5

### 6 ***In vitro* characterization of RNA polymerase I bearing *RPA135-F301S***

7 *In vitro*, C-terminal part of Rpa49 is essential in promoter-dependent transcription assay [23].  
8 Our *in vivo* analysis suggests that in *RPA135-F301S* mutant background, C-terminal part of  
9 Rpa49 is not required for rRNA synthesis. Our hypothesis is that Rpa135-F301S partly  
10 compensates the requirement for C-terminal part of Rpa49 in initiation. We used the  
11 promoter-dependent *in vitro* transcription system and tailed-template system to assess this  
12 hypothesis (Fig. 6A and B). Results were strikingly different when using promoter-dependent  
13 or tailed-template systems. After depletion of Rpa49, purified Pol I lacks both Rpa34 and  
14 Rpa49 subunits and is the so-called Pol A\* complex [23,25,31]. Pol I lacking subunits  
15 Rpa49/Rpa34 (Pol A\*, Fig. 6A lane 2) was almost inactive in promoter-dependent assay  
16 when compared to wild-type Pol I (WT) or Pol I bearing Rpa135-F301S (Fig. 6A, lane 1 and  
17 3). Note that addition of recombinant Rpa34/Rpa49, Rpa49Ct alone or Rpa34/Rpa49N-ter  
18 stimulated transcription by Pol A\* [23]. Ruling out our hypothesis, Pol I bearing Rpa135-  
19 F301S did not restore promoter-dependent activity of RNA Pol I lacking Rpa49 (Fig. 6A lane  
20 4). We next tested RNA synthesis in a tailed-template system. Pol I lacking Rpa34/Rpa49 was  
21 partly deficient in tailed template assay (Fig. 6B, lane 2) [23]. Interestingly, in this promoter-  
22 independent assay, we clearly observed that the RNA synthesis by the polymerase bearing  
23 Rpa135-F301S was increased compared to one with the WT polymerase (Fig. 6B compare  
24 lane 1 to 3). Moreover, Pol I bearing Rpa135-F301S fully restored tailed template production  
25 of RNA Pol I lacking Rpa49 (Fig. 6B, lane 4). We conclude that in the *in vitro* promoter-

1 dependent transcription assay, *RPA135-F301S* suppressor does not correct initiation defect  
2 due to the absence of Rpa49. However, in presence of Rpa135-F301S, a more efficient  
3 polymerase is engineered, able to produce more ribosomal RNAs from DNA tailed template.

4

#### 5 ***In vivo* characterization of RNA polymerase I bearing Rpa135-F301S**

6 *In vitro*, Pol I bearing Rpa135-F301S is over-producing RNA compared to WT. However *in*  
7 *vivo*, we could not reveal increased production of rRNA (2 min pulse labelling, see Fig. 3B).  
8 Pre-rRNAs which are not properly folded into pre-ribosome are targeted to degradation by the  
9 3' to 5' exoribonucleolytic activity of the exosome [39]. We hypothesized that overproduced  
10 rRNAs in *RPA135-F301S* mutant background could be targeted by the nuclear exosome.  
11 Rrp6, part of the nuclear exosome complex, was deleted in a WT strain and in a strain bearing  
12 *RPA135-F301S* mutation. We observed a strong synergistic growth defect in strain bearing  
13 both *RPA135-F301S* and the deletion of *RRP6* (S5 Fig). Northern blot analysis (Fig. 7A)  
14 showed that accumulation in *RPA135-F301S* single mutant was indistinguishable from the  
15 WT for all RNA probed. *rrp6Δ* single mutant accumulates 23S and 35S (pre-)rRNA [40,41]  
16 and in correlation with the growth defect of the double mutant *RPA135-F301S rrp6Δ*, we  
17 could observe a 2-fold increase in 35S and 23S (pre-)rRNA accumulation as compared to  
18 *rrp6Δ*. Accumulation of 35S and 23S could indicate an increase of RNA production, or a  
19 defect in early maturation steps. We decided to directly assess over-expression of (pre-)rRNA  
20 using short *in vivo* labelling experiments (40 seconds). As previously reported with very short  
21 pulse labelling, accumulation of 20S rRNA is barely detectable, while 27SA and 35S are  
22 already accumulated [42]. We could detect a strong accumulation of newly synthesized (pre-)  
23 rRNA in the double mutant *RPA135-F301S rrp6Δ* compared to WT, *RPA135-F301S* or *rrp6Δ*  
24 strains. Note that increased background signal could indicate an accumulation of partially  
25 degraded, abortive transcripts or elongating rRNA transcript of various sizes. These results



1 suggests that rRNA are over-expressed in strain bearing *RPA135-F301S*, but are quickly  
2 decayed by Rrp6. We confirmed this observation by evaluating ongoing transcription  
3 independently of decay machinery using high-resolution transcriptional run-on (TRO)  
4 analysis (Fig. 7C). Indeed, TRO assay make use of 10% sarkosyl, which permeabilizes cell  
5 membranes, reversibly blocks elongating polymerases and inhibits RNase activity [43–46].  
6 Permeabilized cells are then incubated with [ $\alpha^{32}$ P]-UTP to resume transcription.  
7 Neosynthesized radiolabeled RNAs are extracted, and used to probe slot-blot loaded with  
8 single strand DNA fragments complementary to rDNA locus. Using incorporation of [ $\alpha^{32}$ P]-  
9 UTP in the 5S rRNA transcribed by RNA polymerase III as internal control, TRO revealed a  
10 three-fold increase of rRNA transcription in cells bearing *RPA135-F301S* allele, irrespective  
11 of Rrp6 presence (Fig. 7C). These results confirmed that Pol I bearing Rpa135-F301S is over-  
12 producing RNA compared to WT and that over-produced RNAs are targeted for degradation  
13 by the exosome. All together, we concluded that Pol I bearing Rpa135-F301S is a hyper-  
14 active RNA polymerase *in vivo*.

15

## 1 **Discussion**

2 Here, we characterized extragenic suppressors of the growth defect of the *rpa49* null mutant  
3 to better understand the activity of Pol I. We showed that altering a very specific area of Pol I  
4 resulted in an enzyme with modified catalytic properties sufficient to restore wild-type growth  
5 in absence of Rpa49.

6

### 7 **Suppressor mutations are not at the Rrn3-Pol I stalk interface**

8 Our previous studies suggested the specific involvement of Rpa49 in the association and  
9 dissociation of initiation factor Rrn3 from the Pol I stalk [26,29]). Here, we show that  
10 genetically modified polymerases lacking Rpa49 or Rpa49Ct, with a single modified residue  
11 in Rpa190, Rpa135, or Rpa12, at a position diametrically to the position that binds to Rrn3,  
12 can initiate transcription and that strains harbouring them grow normally. Moreover, mutant  
13 Pol I with Rpa135-F301S does not restore promoter dependent activity in absence of Rpa49.  
14 We propose that, independently of the important interplay between Rpa49 and Rrn3 during  
15 initiation, Rpa135-F301S can stimulate Pol I activity.

16

### 17 **A novel role of Rpa12 subunit**

18 The Rpa12 subunit is involved in stimulating the intrinsic cleavage activity of Pol I through a  
19 TFIIIS-like domain at its C-terminus. Purified Pol I with Rpa12 lacking the C-terminal domain  
20 has no cleavage activity [17]. Furthermore, the C-terminal domain of Rpa12 can contact the  
21 active site of the polymerase in the inactive conformation and is retrieved in both initiation  
22 competent and elongating forms of the polymerase. However, the cleavage activity is re-  
23 activated when Pol I is paused [36]. Direct evidence that cleavage is not involved in  
24 suppression of the growth defect came from the experiments showing a fully functional

1 suppressor phenotype for *RPA12ΔCt-S6L*, which lacks the domain required for stimulating  
2 cleavage.

3 The N-terminal domain of Rpa12, at the surface of Pol I, is involved in the recruitment of the  
4 largest subunit, Rpa190 [24] and is required for docking this subunit to the enzyme. A linker  
5 region of Rpa12 connects its N-terminal module (equivalent to the N-terminal domain in the  
6 Pol II subunit Rpb9) at the surface of Pol I to its mobile C-terminal region (TFIIS-like) and is  
7 therefore indirectly required for cleavage. *In vitro*, purified Pol I that lacks Rpa12 has less  
8 activity than WT Pol I in promoter-dependent transcription assays (data not shown).  
9 Mutations in other Pol I domains, such as deletions in the Rpa190-DNA mimicking loop,  
10 Rpa34 or Rpa14, did not influence suppression of the *rpa49* deletion growth defect by the  
11 *RPA135-F301S* allele. In contrast, the Rpa12 linker was absolutely required for efficient  
12 suppression. Accordingly, *RPA135-F301S* allele was unable to restore efficient growth when  
13 Rpa12 was absent. Thus, Rpa12 and *RPA135-F301S* likely cooperate in the super-active Pol I  
14 enzyme. Note that rearrangement of Rpa12 have recently be shown to correlate with  
15 dissociation of Rpa49/Rpa34 heterodimer from Pol I, confirming the tight interplay between  
16 those subunits [47].

### 17 **Modification of the jaw/lobe interface may facilitate DNA cleft closure**

18 Pol I undergoes major conformational changes during the transcription cycle, mainly affecting  
19 the width of the DNA-binding cleft [48]. During the initiation of transcription, the cleft  
20 aperture narrows from a semi-open configuration, as seen in cryo-EM structures of the  
21 enzyme bound to Rrn3 [12,23,34], to a fully closed conformation observed in transcribing  
22 complexes [13,15] (Fig. 8). This allows gripping of the transcription bubble inside the cleft  
23 (Fig. 8A-B). Following Rrn3 release, DNA binding is further secured, by the Rpa49-linker,  
24 which crosses the cleft from the lobe to the clamp, passing over the downstream DNA, and by

1 the Rpa49Ct, which binds the upstream DNA in the vicinity of the clamp [15,22]. Therefore,  
2 Rpa49Ct is anchored in a position securing cleft closure (Fig. 8B).

3 Cleft closure is achieved by the relative movement of two structural units, located on opposite  
4 sides of the cleft, pivot with respect to each other using five hinges [4]. The unit consisting of  
5 the shelf and clamp modules appears to be rigid, whereas the unit comprising the core and  
6 lobe modules, which is in the vicinity of the mutated residues involved in suppression of the  
7 *rpa49Δ* growth defect, undergoes internal rearrangements (S1 Movie). The most prominent  
8 reorganization within this latter unit affects the Rpa190 jaw domain, the outer rim of which  
9 shifts away from the DNA by approximately 3.7 Å, using the lobe/jaw interface as a hinge  
10 (Fig. 8B; blue arrow). This movement also involves the linker region of Rpa12, which  
11 contains a  $\beta$ -strand (residues 46-50) that completes a four-stranded  $\beta$ -sheet in the Rpa190 jaw  
12 domain. As a result, a short  $\alpha$ -helix within the Rpa12 linker region shifts by approximately  
13 3.0 Å (Fig. 8B; yellow arrow).

14 Rearrangements in the jaw made up of regions of Rpa190 and Rpa12 are likely essential to  
15 allow pivoting of the shelf-clamp unit against the core-lobe unit. Without such motion, cleft  
16 closure would be impossible (S1 Movie). Structural analysis suggests that the C-terminal  
17 domain of Rpa49 and its linker domain are involved in securing the closed cleft conformation  
18 [15,22]. Cleft closure is likely destabilized in the *rpa49Δ* mutant (Fig. 8C). We propose that  
19 Rpa135-F301S or Rpa12-S6L favors DNA capture by increasing the flexibility of the  
20 lobe/jaw/Rpa12 interface of Pol I relative to that of the WT polymerase, facilitating cleft  
21 closure in the absence of Rpa49 (Fig. 8D, red arrow). As shown *in vitro*, mutant Pol I with  
22 Rpa135-F301S is super-active. *In vivo*, the increased accumulation of pre-rRNA, detectable in  
23 absence of the nuclear exosome (*rrp6Δ*), is in agreement with the *in vitro* super-activity. We  
24 propose that Pol I bearing Rpa135-F301S might facilitate cleft closure, in addition to secure

1 cleft closure by Rpa49. Such mutant enzyme could capture DNA more efficiently than WT  
2 polymerase (Fig. 8E). Alternatively, the mutations could also favour a 'closed cleft'  
3 conformation in the presence of DNA with little impact on flexibility.

4

#### 5 **Pol I cleft closure is a limiting step in catalytic cycle**

6 Here, we show that Pol I can be engineered to generate more rRNA. A super-active mutant of  
7 Pol II was already characterized: point mutation in trigger loop (Rpb1-E1103G) leads to  
8 increase RNA polymerization rate, affecting pausing and transcriptional fidelity [49,50].  
9 Despite a very similar active site organization, an analogous mutation in the Pol I trigger loop  
10 resulted in a very different outcome, as it reduces the elongation rate [51]. Such observations  
11 led to the conclusion that Pol I catalytic cycle is very different than the one of Pol II, with  
12 different rate limiting steps [51–53]. We show here that mutations away of the active center  
13 can lead to a super-active form of Pol I. This difference can stem from wide-open  
14 configuration of the DNA-binding cleft in Pol I compared to other polymerases. We propose  
15 that Pol I cleft opening and closure is a limiting step in the Pol I catalytic cycle.

16

## 1 **Materials and Methods**

### 2 **Construction of plasmids and yeast strains**

3 The oligonucleotides used in this study are listed in S4 Table. Plasmids and details of the  
4 cloning steps are described in S3 Table. Randomly mutagenized *RPA190* and *RPA135*  
5 libraries were obtained by transformation and amplification of pVV190 and pNOY80,  
6 respectively, into XL1-red strains according to the manufacturer's guidelines (XL1-Red  
7 Competent Cells, from Agilent Technologies). Yeast strains are listed in S2Table, and were  
8 constructed by meiotic crossing and DNA transformation [54][55]. The yeast media and  
9 genetic techniques were described previously [56]. yCNOD226-1a was obtained from  
10 yCNOD223-2a by switching the *KAN-MX* to the *NAT-MX* marker under the control of the  
11 MF(ALPHA)2/YGL089C promoter (alphaNAT-MX4), which allowed selection of MAT $\alpha$   
12 haploid cells [33]. OGT9-6a is an offspring of yCNOD226-1a crossed with BY4741. OGT8-  
13 11a is an offspring of BY4742 crossed with Y1196. Strains OGT9-6a and OGT8-11a were  
14 plated on rich media and UV irradiated (5W/m<sup>2</sup> during 5 second), resulting in 50% survival.  
15 LH514D and LH11D are suppressor clones of the growth defect selected from UV-irradiated  
16 OGT9-6a grown at 25°C. AH29R is a suppressor clone of the growth defect selected from  
17 UV-irradiated OGT8-11a grown at 25°C. Genetic interaction mapping (GIM) analysis of the  
18 *RPA49* deletion mutant was performed as described previously [33]. Microarray data were  
19 normalized using MATLAB (MathWorks, Inc., Natick, MA) as previously described [29].  
20 OGT15-7b is an offspring of LH514D with BY4741, followed by homologous recombination  
21 using PCR-amplified fragments generated with oligos 1716 and 1717 and pCR4-HIS3 as  
22 template. yTD16-1a was first transformed with plasmid pCJPF4-GAL49-1. Then, *RPA135*  
23 was tagged by homologous recombination using PCR-amplified fragments generated with  
24 oligos 835 and 836 and genomic DNA of strain *RPA135-TAP* or yTD6-6c, generating yTD27-  
25 1 and yTD28-1a, respectively. Strain yTD25-1a bears a C-terminal deletion of *RPA49*

1 generated by homologous recombination using PCR-amplified fragments generated with  
2 oligos 208 and 1515 and pFA6-KAN-MX6 as template. yTD11-1a was derived from strain  
3 yTD25-1a after switching to HPH-MX by homologous recombination using pUC19-HPH cut  
4 by *Bam*HI. C-terminal deletion of *RPA49* in yTD29-1a and yTD30-1a were generated by  
5 homologous recombination using PCR-amplified fragments generated with oligos 649 and  
6 650 and yTD11-1 genomic DNA as template, transformed into yTD27-1 and yTD28-1a,  
7 respectively. Genomic allelic insertion of *RPA12-S6L* in yTD31-1a and yTD23-1a was  
8 performed by homologous recombination using PCR-amplified fragments generated with  
9 oligos 1556 and 1557 and pRS316-A12-S6L-KAN as template, transformed into yTD27-1  
10 and yTD29-1a, respectively.

11 TGT135-3b was obtained after sporulation of y27138 transformed by pNOY80. TGT135-3b  
12 and OGT15-9d were mated to generate TGT12. yTD2-3b and yTD2-3d are offspring of  
13 TGT12 transformed with pGL135\_33. yTD6-6c and yTD6-6b were generated by homologous  
14 recombination using pTD2\_6c\_135TAP cut with *Xho*I-*Nsi*I, transformed into yTD2-3b and  
15 yTD2-3d, respectively. yTD48-1a was generated by deletion of the Rpa190 DNA-mimicking  
16 loop using homologous recombination with PCR-amplified fragments generated using oligos  
17 1189 and 1194 and genomic DNA of strain SCOC2260 as template, transformed into  
18 BY4741.

19 yTD51-2c, yTD51-8a, and yTD51-5a are offspring of yTD48-1a mated with yTD37-3a.  
20 yTD36-2b is an offspring of yCN224-1a mated with yTD40-1a. yTD37-3d and yTD37-7d are  
21 offspring of yCN224-1a mated with yTD41-1a. yTD38-3d is an offspring of yCN225-1a  
22 mated with yTD40-1a and yTD39-8a is an offspring of yCN225-1a mated with yTD41-1a.

23 Strain yTD53-1a was constructed by homologous recombination using a PCR-amplified  
24 fragment generated with oligos 1634 and 1635 and pFA6a-KanMX6-GAL::3HA as template.

1 OGT30-1a and OGT30-3a are offspring of yTD53-1a mated with yTD6-6b. yTD40-1a and  
2 yTD41-1a were generated by homologous recombination using PCR-amplified fragments  
3 generated with oligos 700 and 1679 and pFA6a-HA-KIURA3 as template, transformed into  
4 OGT30-3a and OGT30-1a respectively, switching *RPA135-TAP*-tag to untagged *RPA135*.  
5 Strain yMKS8-1a was constructed by homologous recombination using a PCR-amplified  
6 fragment generated with oligos 1711 and 1713 and pFA6a-KanMX6-GAL::3HA as template,  
7 transformed into strain yCD2-2a. yMKS9-9d is offspring of yMKS8-1a mated with yTD6-6c.

### 8 **Mapping extragenic suppressors allele by genetic linkage**

9 Extragenic suppressors allele SGR were mapped using GIM methods, in which a strain is  
10 crossed with the entire pool of haploid deletion strains [57]. Here, deletions are used to  
11 evaluate linkage to SGR locus. Due to the genetic suppression, Individual deletions  
12 genetically linked to SGR are counter-selected in *rpa49Δ* background. Genetic mapping of  
13 SGR locus is based on strong genetic linkage of counter-selected deletion alleles (see S1 Fig),  
14 evaluated using micro-array of deletion bar-code (ArrayExpress accession E-MTAB-7831)  
15 [58].

16

### 17 ***In vivo* labelling and RNA extraction and analysis**

18 Metabolic labelling of pre-rRNA was performed as previously described [59] with the  
19 following modifications. Strains were pre-grown in synthetic glucose-containing medium  
20 lacking adenine at 30°C to an OD<sub>600</sub> of 0.8 at. One-milliliter cultures were labeled with 50  
21 μCi [8-<sup>3</sup>H] adenine (NET06300 PerkinElmer) for 2 min. Cells were collected by  
22 centrifugation and the pellets were frozen in liquid nitrogen. RNA was then extracted as  
23 previously described [60] and precipitated with ethanol. For high molecular weight RNA  
24 analysis, 20% of the RNA was glyoxal denatured and resolved on a 1.2% agarose gel. Low  
25 molecular weight RNAs were resolved on 8% polyacrylamide/8.3 M urea gels.



## 1 **Miller spreads experiments and analysis**

2 Chromatin spreading was mainly performed as described previously with minor modifications  
3 [61]. Carbon-coated grids were rendered hydrophilic by glow discharge instead of ethanol  
4 treatment. Negatively stained chromatin was obtained by short incubation with heavy metal  
5 followed by quick drying of the sample. Images were obtained using a JEOL JEM-1400 HC  
6 electron microscope (40 to 120 kV) with an Orius camera (11Mpixels). The position of the  
7 RNA polymerase I molecules and the rDNA fiber were determined by visual inspection of  
8 micrographs using Image J (<http://rsb.info.nih.gov/ij/>). Digital images were processed by  
9 software programs Image J and Adobe Photoshop® (v. CS6).

10

## 11 ***In vitro* promoter-dependent and tailed template transcription assays**

12 *In vitro* promoter-dependent transcription reactions were performed as previously described  
13 [23,62] with some modifications. Briefly, 1.5 ml reaction tubes (Sarstedt safety seal) were  
14 placed on ice. Template (0.5–1  $\mu$ l; 50–100 ng DNA) was added, corresponding to a final  
15 concentration of 5–10 nM per transcription reaction (25- $\mu$ l reaction volume). Core factor (1–2  
16  $\mu$ l; 0.5 to 1 pmol/ $\mu$ l; final concentration 20–40 nM) and 1–3  $\mu$ l Pol I (final concentration 4–12  
17 nM) were added to each tube. Then, 20 mM HEPES/KOH pH 7.8 was added to a final  
18 volume of 12.5  $\mu$ l. Transcription was started by adding 12.5  $\mu$ l 2X transcription buffer. The  
19 samples were incubated at 24°C for 30 min at 400 rpm in a thermomixer.

20 25 nM of tailed templates were used in a total volume of 25  $\mu$ l. The transcription was  
21 performed as described in promoter-dependent transcription reactions: Tailed templates are  
22 PCR-amplified fragments generated with oligos 1834 and 1835 and “pUC19tail\_g-  
23 \_601\_elongated” as PCR-template, treated with Nb.BsmI (NEB) to generate a nick. Nicked  
24 site allows non-specific initiation of Pol I without the addition of initiation factors.

25

1 Transcription was stopped by adding 200  $\mu$ l Proteinase K buffer (0.5 mg/ml Proteinase K in  
2 0.3 M NaCl, 10 mM Tris/HCl pH 7.5, 5 mM EDTA, and 0.6% SDS) to the supernatant. The  
3 samples were incubated at 30°C for 15 min at 400 rpm in a thermomixer. Ethanol (700  $\mu$ l)  
4 p.a. was added and the tubes mixed. Nucleic acids were precipitated at -20°C overnight or for  
5 30 min at -80°C. The samples were centrifuged for 10 min at 12,000g and the supernatant  
6 removed. The precipitate was washed with 0.15 ml 70% ethanol. After centrifugation, the  
7 supernatant was removed and the pellets dried at 95°C for 2 min. RNA in the pellet was  
8 dissolved in 12  $\mu$ l 80% formamide, 0.1 M TRIS-Borate-EDTA (TBE), 0.02% bromophenol  
9 blue, and 0.02% xylene cyanol. Samples were heated for 2 min with vigorous shaking at 95°C  
10 and briefly centrifuged. After loading on a 6% polyacrylamide gel containing 7M urea and 1X  
11 TBE, RNAs were separated by applying 25 watts for 30–40 min. The gel was rinsed in water  
12 for 10 min and dried for 30 min at 80°C using a vacuum dryer. Radiolabelled transcripts were  
13 visualised using a PhosphoImager.

14

#### 15 **RNA extractions and Northern Hybridizations.**

16 RNA extractions and Northern hybridizations were performed as previously described [60].  
17 For high molecular weight RNA analysis, 3 $\mu$ g of total RNA were glyoxal denatured, resolved  
18 on a 1.2% agarose gel and transferred to a nylon membrane. The sequences of  
19 oligonucleotides used to detect the RNA species: 35S rRNA, 25S rRNA, 20S rRNA, 18S  
20 rRNA, 27S rRNA, *PGK1* mRNA and *SCR1* ncRNA are respectively 774, 1829, 1833, 892,  
21 1830, 1831 and 1832 are reported in S4 Table.

22 **Chromatin immunoprecipitation (ChIP).** ChIPs were performed essentially as described  
23 previously [63]. At least three independent cultures of each yeast strain were grown to  
24 exponential phase  $OD_{600} = 0.4-0.8$  in YPD (yeast extract-peptone-glucose) at 30°C, and cross-  
25 linked for 10 min at RT by the addition of formaldehyde (F1635, SIGMA) to a final

1 concentration of 1.2%. Adding glycine quenched the cross-linking reaction. Cells were  
2 broken in lysis buffer (50 mM HEPES [pH 7.5], 150 mM NaCl, 1 mM EDTA, 1% Triton X-  
3 100, 0.1% deoxycholate Na, 0.1% SDS, 1 mM AEBSF [Euromedex] and cOmplete EDTA-  
4 free [Roche]) with glass beads (diameter, 0.425 to 0.6 mm; SIGMA) in a Precellys 24  
5 homogenizer (bertin technologies) for 3 min, 6000 rpm at 4°C. Extracted chromatin was  
6 sonicated to obtain 300-500 bp DNA fragments. 100 µg of sonicated chromatin (protein  
7 content measured using BCA Protein Assay kit, ref# 23225, Thermo Scientific) was  
8 immunoprecipitated for 4h at 21°C on Pan mouse Dynabeads (Invitrogen, 200 µl).  
9 Immunoprecipitated DNA was purified and quantified by real-time qPCR using iTaq  
10 universal SYBR®Green Supermix (Bio-Rad) and the ViiA7 AB Applied Biosystems (Life  
11 Technologies). Primer pairs used for amplification are listed in S4 table. Signals were  
12 analysed with Quant Studio Real Time PCR Software v1.1 and are expressed as percentage of  
13 input DNA. Bars on the graph show the median of values normalised to wild-type value.  
14 Error bars correspond to standard deviations of at least three independent cultures for each  
15 strain.

16 **Pulse-field gel electrophoresis (PFGE).** PFGE is a technique that resolves chromosome-  
17 sized DNA molecules in an agarose gel. Over-night YPD cultures at 30°C were harvested in  
18 0.1% azide Na and kept on ice. Cells were washed twice in cold 0.05 M EDTA [pH 8.0].  
19  $\sim 2 \cdot 10^8$  cells were resuspended in 1ml of freshly prepared NZ buffer (Citrate Phosphate buffer  
20 33 mM, EDTA 0.05 M [pH 8.0], Sorbitol 1.2 M). Cells were pellets (8000 rpm, 1 min, 4°C)  
21 and resuspended in 500 µL of Zymolyase buffer (NZ buffer with 20T zymolyase) and 500 µL  
22 LMP 2% (SeaKem LE agarose, Lonza, ref# 50001). Homogenized pellets were poured into  
23 the plug molds ( $\sim 100$  µl/plug) and incubated for 30 min in humid chamber at 37°C then 10  
24 min at 4°C. Solidified plugs were transferred in 14 ml tubes with round bottom and incubate  
25 with 400 µl/plug of PK buffer (EDTA 0.125 M [pH 9.5], Sarkosyl 1%, PK 1 mg/ml (Roche,

1 ref# 03115801001) and incubated 1-2 hours at 37°C with gentle agitation. PK buffer was  
2 changed and plugs were incubated O/N with gentle agitation. De-proteinated plugs were  
3 washed with 10 ml TE followed by washing with 10 ml TE + 1 mM AEBSF (Euromedex) for  
4 2 hours. AEBSF was washed out twice with 10 ml of 0.05 M EDTA [pH 8.0] for 30 minutes.  
5 Plugs were stored at 4°C till usage in TE or 0.05 M EDTA [pH 8.0]. Plugs were loaded on  
6 0.8% agarose gel in 1×TAE buffer (Certified Megabase agarose, Bio-Rad, ref# 161-3109) and  
7 run in 1×TAE buffer for 50h in CHEF-DRIII System with chiller unit (Bio-Rad) with  
8 following parameters: 3V/cm, initial S/time 250 sec, final S/time 900 sec, angle 120. Gel was  
9 stained with ethidium bromide (10 mg/ml in water). Gel was processed for Southern blotting:  
10 DNA was transferred on nylon membrane by passive transfer in 10×SSC buffer (Amersham  
11 Hybond XL, GE Healthcare). Membranes were UV-cross-linked and hybridized overnight  
12 with <sup>32</sup>P-labeled single-stranded DNA probes at 42 °C. Blots were washed twice with 2×SSC  
13 and 1% SDS for 20 min and once with 0.5×SSC and 1% SDS for 20 min at 37 °C. rDNA  
14 locus (chromosome XII) was detected with 18S specific probe  
15 (CATGGCTTAATCTTTGAGAC). This protocol was kindly provided by B. Pardo (IGH,  
16 Montpellier, France), and is extensively described in [64].

17

#### 18 Transcriptional run-on analysis

19 TRO was performed as previously described [39,43]. Slot blots were loaded with single-  
20 stranded 80-mers DNA oligonucleotides: 1855 (NTS2), 1857 (5'ETS), 1859 (18S.2), 1860  
21 (25S.1), 1861 (3'ETS), 1862 (NTS1), 1863 (5S US) and 1864 (5S DS).

22

23

24

## 1 **Acknowledgements**

2 We would like to thank the imaging platform of Toulouse TRI for their assistance. We thank  
3 Margaux Cescato, Lilian Guillot and Jorge Perez-Fernandez for strain and plasmid  
4 constructions. YCp50-26 carrying *RPA49* was kindly provided by P. Thuriaux. We also thank  
5 Melanie Panarotto for the Miller spreads analysis. This work benefited from exchanges with  
6 all unit members, including Anthony Henras, Frederic Beckouët and Lise Dauban. We thank  
7 Stephanie Balor and Vanessa Soldan from the METI platform for the TEM acquisitions.

8

## 1 References

- 2
- 3 1. Chambon P (1975) Eukaryotic nuclear RNA polymerases. *Annu Rev Biochem* 44: 613–
- 4 638. doi:10.1146/annurev.bi.44.070175.003145.
- 5 2. Warner JR (1999) The economics of ribosome biosynthesis in yeast. *Trends Biochem*
- 6 *Sci* 24: 437–440.
- 7 3. Miller OL, Beatty BR (1969) Visualization of nucleolar genes. *Science* 164: 955–957.
- 8 4. Fernández-Tornero C, Moreno-Morcillo M, Rashid UJ, Taylor NMI, Ruiz FM, et al.
- 9 (2013) Crystal structure of the 14-subunit RNA polymerase I. *Nature* 502: 644–649.
- 10 doi:10.1038/nature12636.
- 11 5. Engel C, Sainsbury S, Cheung AC, Kostrewa D, Cramer P (2013) RNA polymerase I
- 12 structure and transcription regulation. *Nature* 502: 650–655. doi:10.1038/nature12712.
- 13 6. Hoffmann NA, Jakobi AJ, Moreno-Morcillo M, Glatt S, Kosinski J, et al. (2015)
- 14 Molecular structures of unbound and transcribing RNA polymerase III. *Nature* 528:
- 15 231–236. doi:10.1038/nature16143.
- 16 7. Cramer P, Bushnell DA, Kornberg RD (2001) Structural basis of transcription: RNA
- 17 polymerase II at 2.8 angstrom resolution. *Science* 292: 1863–1876.
- 18 doi:10.1126/science.1059493.
- 19 8. Werner F (2008) Structural evolution of multisubunit RNA polymerases. *Trends*
- 20 *Microbiol* 16: 247–250. doi:10.1016/j.tim.2008.03.008.
- 21 9. Peyroche G, Milkereit P, Bischler N, Tschochner H, Schultz P, et al. (2000) The
- 22 recruitment of RNA polymerase I on rDNA is mediated by the interaction of the A43
- 23 subunit with Rrn3. *EMBO J* 19: 5473–5482. doi:10.1093/emboj/19.20.5473.
- 24 10. Yamamoto RT, Nogi Y, Dodd JA, Nomura M (1996) RRN3 gene of *Saccharomyces*
- 25 *cerevisiae* encodes an essential RNA polymerase I transcription factor which interacts
- 26 with the polymerase independently of DNA template. *EMBO J* 15: 3964–3973.
- 27 11. Blattner C, Jennebach S, Herzog F, Mayer A, Cheung ACM, et al. (2011) Molecular
- 28 basis of Rrn3-regulated RNA polymerase I initiation and cell growth. *Genes Dev* 25:
- 29 2093–2105. doi:10.1101/gad.17363311.
- 30 12. Torreira E, Louro JA, Pazos I, González-Polo N, Gil-Carton D, et al. (2017) The
- 31 dynamic assembly of distinct RNA polymerase I complexes modulates rDNA
- 32 transcription. *Elife* 6. doi:10.7554/eLife.20832.
- 33 13. Engel C, Gubbey T, Neyer S, Sainsbury S, Oberthuer C, et al. (2017) Structural basis of
- 34 RNA polymerase I transcription initiation. *Cell* 169: 120–131.e22.
- 35 doi:10.1016/j.cell.2017.03.003.
- 36 14. Sadian Y, Tafur L, Kosinski J, Jakobi AJ, Wetzel R, et al. (2017) Structural insights into
- 37 transcription initiation by yeast RNA polymerase I. *EMBO J* 36: 2698–2709.
- 38 doi:10.15252/embj.201796958.
- 39 15. Han Y, Yan C, Nguyen THD, Jackobel AJ, Ivanov I, et al. (2017) Structural mechanism
- 40 of ATP-independent transcription initiation by RNA polymerase I. *Elife* 6.
- 41 doi:10.7554/eLife.27414.
- 42 16. Keener J, Josaitis CA, Dodd JA, Nomura M (1998) Reconstitution of yeast RNA
- 43 polymerase I transcription in vitro from purified components. TATA-binding protein is
- 44 not required for basal transcription. *J Biol Chem* 273: 33795–33802.
- 45 17. Kuhn C-D, Geiger SR, Baumli S, Gartmann M, Gerber J, et al. (2007) Functional
- 46 architecture of RNA polymerase I. *Cell* 131: 1260–1272.
- 47 doi:10.1016/j.cell.2007.10.051.
- 48 18. Geiger SR, Lorenzen K, Schrieck A, Hanecker P, Kostrewa D, et al. (2010) RNA
- 49 polymerase I contains a TFIIF-related DNA-binding subcomplex. *Mol Cell* 39: 583–

- 1 594. doi:10.1016/j.molcel.2010.07.028.
- 2 19. Fernández-Tornero C, Böttcher B, Rashid UJ, Steuerwald U, Flörchinger B, et al.
- 3 (2010) Conformational flexibility of RNA polymerase III during transcriptional
- 4 elongation. *EMBO J* 29: 3762–3772. doi:10.1038/emboj.2010.266.
- 5 20. Landrieux E, Alic N, Ducrot C, Acker J, Riva M, et al. (2006) A subcomplex of RNA
- 6 polymerase III subunits involved in transcription termination and reinitiation. *EMBO J*
- 7 25: 118–128. doi:10.1038/sj.emboj.7600915.
- 8 21. Wu C-C, Lin Y-C, Chen H-T (2011) The TFIIF-like Rpc37/53 dimer lies at the center
- 9 of a protein network to connect TFIIC, Bdp1, and the RNA polymerase III active
- 10 center. *Mol Cell Biol* 31: 2715–2728. doi:10.1128/MCB.05151-11.
- 11 22. Tafur L, Sadian Y, Hoffmann NA, Jakobi AJ, Wetzel R, et al. (2016) Molecular
- 12 structures of transcribing RNA polymerase I. *Mol Cell* 64: 1135–1143.
- 13 doi:10.1016/j.molcel.2016.11.013.
- 14 23. Pilsl M, Crucifix C, Papai G, Krupp F, Steinbauer R, et al. (2016) Structure of the
- 15 initiation-competent RNA polymerase I and its implication for transcription. *Nat*
- 16 *Commun* 7: 12126. doi:10.1038/ncomms12126.
- 17 24. Van Mullem V, Landrieux E, Vandehaute J, Thuriaux P (2002) Rpa12p, a conserved
- 18 RNA polymerase I subunit with two functional domains. *Mol Microbiol* 43: 1105–1113.
- 19 25. Gadal O, Mariotte-Labarre S, Chedin S, Quemeneur E, Carles C, et al. (1997) A34.5, a
- 20 nonessential component of yeast RNA polymerase I, cooperates with subunit A14 and
- 21 DNA topoisomerase I to produce a functional rRNA synthesis machine. *Mol Cell Biol*
- 22 17: 1787–1795.
- 23 26. Beckouet F, Labarre-Mariotte S, Albert B, Imazawa Y, Werner M, et al. (2008) Two
- 24 RNA polymerase I subunits control the binding and release of Rrn3 during
- 25 transcription. *Mol Cell Biol* 28: 1596–1605. doi:10.1128/MCB.01464-07.
- 26 27. Liljelund P, Mariotte S, Buhler JM, Sentenac A (1992) Characterization and
- 27 mutagenesis of the gene encoding the A49 subunit of RNA polymerase A in
- 28 *Saccharomyces cerevisiae*. *Proc Natl Acad Sci USA* 89: 9302–9305.
- 29 28. Nogi Y, Yano R, Dodd J, Carles C, Nomura M (1993) Gene RRN4 in *Saccharomyces*
- 30 *cerevisiae* encodes the A12.2 subunit of RNA polymerase I and is essential only at high
- 31 temperatures. *Mol Cell Biol* 13: 114–122.
- 32 29. Albert B, Léger-Silvestre I, Normand C, Ostermaier MK, Pérez-Fernández J, et al.
- 33 (2011) RNA polymerase I-specific subunits promote polymerase clustering to enhance
- 34 the rRNA gene transcription cycle. *J Cell Biol* 192: 277–293.
- 35 doi:10.1083/jcb.201006040.
- 36 30. Gadal O, Labarre S, Boschiero C, Thuriaux P (2002) Hmo1, an HMG-box protein,
- 37 belongs to the yeast ribosomal DNA transcription system. *EMBO J* 21: 5498–5507.
- 38 31. Huet J, Buhler JM, Sentenac A, Fromageot P (1975) Dissociation of two polypeptide
- 39 chains from yeast RNA polymerase A. *Proc Natl Acad Sci USA* 72: 3034–3038.
- 40 32. Viktorovskaya OV, Appling FD, Schneider DA (2011) Yeast transcription elongation
- 41 factor Spt5 associates with RNA polymerase I and RNA polymerase II directly. *J Biol*
- 42 *Chem* 286: 18825–18833. doi:10.1074/jbc.M110.202119.
- 43 33. Decourty L, Saveanu C, Zemam K, Hantraye F, Frachon E, et al. (2008) Linking
- 44 functionally related genes by sensitive and quantitative characterization of genetic
- 45 interaction profiles. *Proc Natl Acad Sci USA* 105: 5821–5826.
- 46 doi:10.1073/pnas.0710533105.
- 47 34. Engel C, Plitzko J, Cramer P (2016) RNA polymerase I-Rrn3 complex at 4.8 Å
- 48 resolution. *Nat Commun* 7: 12129. doi:10.1038/ncomms12129.
- 49 35. Neyer S, Kunz M, Geiss C, Hantsche M, Hodirna V-V, et al. (2016) Structure of RNA
- 50 polymerase I transcribing ribosomal DNA genes. *Nature* 540: 607–610.

- 1       doi:10.1038/nature20561.
- 2   36. Sanz-Murillo M, Xu J, Belogurov GA, Calvo O, Gil-Carton D, et al. (2018) Structural  
3       basis of RNA polymerase I stalling at UV light-induced DNA damage. *Proc Natl Acad*  
4       *Sci USA*. doi:10.1073/pnas.1802626115.
- 5   37. Cioci F, Vu L, Eliason K, Oakes M, Siddiqi IN, et al. (2003) Silencing in yeast rDNA  
6       chromatin: reciprocal relationship in gene expression between RNA polymerase I and  
7       II. *Mol Cell* 12: 135–145.
- 8   38. Takeuchi Y, Horiuchi T, Kobayashi T (2003) Transcription-dependent recombination  
9       and the role of fork collision in yeast rDNA. *Genes Dev* 17: 1497–1506.  
10       doi:10.1101/gad.1085403.
- 11 39. Wery M, Ruidant S, Schillewaert S, Leporé N, Lafontaine DLJ (2009) The nuclear  
12       poly(A) polymerase and Exosome cofactor Trf5 is recruited cotranscriptionally to  
13       nucleolar surveillance. *RNA* 15: 406–419. doi:10.1261/rna.1402709.
- 14 40. LaCava J, Houseley J, Saveanu C, Petfalski E, Thompson E, et al. (2005) RNA  
15       degradation by the exosome is promoted by a nuclear polyadenylation complex. *Cell*  
16       121: 713–724. doi:10.1016/j.cell.2005.04.029.
- 17 41. Houseley J, Tollervey D (2006) Yeast Trf5p is a nuclear poly(A) polymerase. *EMBO*  
18       *Rep* 7: 205–211. doi:10.1038/sj.embor.7400612.
- 19 42. Kos M, Tollervey D (2010) Yeast pre-rRNA processing and modification occur  
20       cotranscriptionally. *Mol Cell* 37: 809–820. doi:10.1016/j.molcel.2010.02.024.
- 21 43. Prescott EM, Osheim YN, Jones HS, Alen CM, Roan JG, et al. (2004) Transcriptional  
22       termination by RNA polymerase I requires the small subunit Rpa12p. *Proc Natl Acad*  
23       *Sci USA* 101: 6068–6073. doi:10.1073/pnas.0401393101.
- 24 44. Smale ST (2009) Nuclear run-on assay. *Cold Spring Harb Protoc* 2009: pdb.prot5329.  
25       doi:10.1101/pdb.prot5329.
- 26 45. Green MH, Buss J, Gariglio P (1975) Activation of nuclear RNA polymerase by  
27       sarkosyl. *Eur J Biochem* 53: 217–225. doi:10.1111/j.1432-1033.1975.tb04060.x.
- 28 46. Wery M, Gautier C, Descrimes M, Yoda M, Vennin-Rendos H, et al. (2018) Native  
29       elongating transcript sequencing reveals global anti-correlation between sense and  
30       antisense nascent transcription in fission yeast. *RNA* 24: 196–208.  
31       doi:10.1261/rna.063446.117.
- 32 47. Tafur L, Sadian Y, Hanske J, Wetzel R, Weis F, et al. (2019) The cryo-EM structure of  
33       a 12-subunit variant of RNA polymerase I reveals dissociation of the A49-A34.5  
34       heterodimer and rearrangement of subunit A12.2. *Elife* 8. doi:10.7554/eLife.43204.
- 35 48. Fernández-Tornero C (2018) RNA polymerase I activation and hibernation: unique  
36       mechanisms for unique genes. *Transcription*: 1–7.  
37       doi:10.1080/21541264.2017.1416267.
- 38 49. Malagon F, Kireeva ML, Shafer BK, Lubkowska L, Kashlev M, et al. (2006) Mutations  
39       in the *Saccharomyces cerevisiae* RPB1 gene conferring hypersensitivity to 6-azauracil.  
40       *Genetics* 172: 2201–2209. doi:10.1534/genetics.105.052415.
- 41 50. Kaplan CD, Larsson K-M, Kornberg RD (2008) The RNA polymerase II trigger loop  
42       functions in substrate selection and is directly targeted by alpha-amanitin. *Mol Cell* 30:  
43       547–556. doi:10.1016/j.molcel.2008.04.023.
- 44 51. Viktorovskaya OV, Engel KL, French SL, Cui P, Vandeventer PJ, et al. (2013)  
45       Divergent contributions of conserved active site residues to transcription by eukaryotic  
46       RNA polymerases I and II. *Cell Rep* 4: 974–984. doi:10.1016/j.celrep.2013.07.044.
- 47 52. Viktorovskaya OV, Schneider DA (2015) Functional divergence of eukaryotic RNA  
48       polymerases: unique properties of RNA polymerase I suit its cellular role. *Gene* 556:  
49       19–26. doi:10.1016/j.gene.2014.10.035.
- 50 53. Appling FD, Schneider DA, Lucius AL (2017) Multisubunit RNA polymerase cleavage



- 1 factors modulate the kinetics and energetics of nucleotide incorporation: an RNA  
2 polymerase I case study. *Biochemistry* 56: 5654–5662.  
3 doi:10.1021/acs.biochem.7b00370.
- 4 54. Schiestl RH, Gietz RD (1989) High efficiency transformation of intact yeast cells using  
5 single stranded nucleic acids as a carrier. *Curr Genet* 16: 339–346.
- 6 55. Sambrook J, Fritsch EF, Maniatis T (1989) *Molecular cloning: a laboratory manual*.  
7 *Molecular cloning: a laboratory manual*. Available:  
8 <https://www.cabdirect.org/cabdirect/abstract/19901616061>.
- 9 56. Sherman F, Fink GR, Hicks JBN (1986) *Methods in Yeast Genetics. A Laboratory*  
10 *Course Manual*. New York: Cold Spring Harbor Laboratory.
- 11 57. Decourty L, Saveanu C, Zemam K, Hantraye F, Frachon E, et al. (2008) Linking  
12 functionally related genes by sensitive and quantitative characterization of genetic  
13 interaction profiles. *Proc Natl Acad Sci U S A* 105: 5821–5826.
- 14 58. Kolesnikov N, Hastings E, Keays M, Melnichuk O, Tang YA, et al. (2015)  
15 *ArrayExpress update--simplifying data submissions*. *Nucleic Acids Res* 43: D1113-6.  
16 doi:10.1093/nar/gku1057.
- 17 59. Hermann-Le Denmat S, Werner M, Sentenac A, Thuriaux P (1994) Suppression of  
18 yeast RNA polymerase III mutations by FHL1, a gene coding for a fork head protein  
19 involved in rRNA processing. *Mol Cell Biol* 14: 2905–2913.
- 20 60. Beltrame M, Tollervey D (1992) Identification and functional analysis of two U3  
21 binding sites on yeast pre-ribosomal RNA. *EMBO J* 11: 1531–1542.
- 22 61. Osheim YN, French SL, Sikes ML, Beyer AL (2009) Electron microscope visualization  
23 of RNA transcription and processing in *Saccharomyces cerevisiae* by Miller chromatin  
24 spreading. *Methods Mol Biol* 464: 55–69. doi:10.1007/978-1-60327-461-6\_4.
- 25 62. Tschochner H (1996) A novel RNA polymerase I-dependent RNase activity that  
26 shortens nascent transcripts from the 3' end. *Proc Natl Acad Sci USA* 93: 12914–12919.
- 27 63. Kwapisz M, Ruault M, van Dijk E, Gourvenec S, Descrimes M, et al. (2015)  
28 *Expression of Subtelomeric lncRNAs Links Telomeres Dynamics to RNA Decay in S.*  
29 *cerevisiae*. *Noncoding RNA* 1: 94–126. doi:10.3390/ncrna1020094.
- 30 64. Hage AE, Houseley J (2013) Resolution of budding yeast chromosomes using pulsed-  
31 field gel electrophoresis. *Methods Mol Biol* 1054: 195–207. doi:10.1007/978-1-62703-  
32 565-1\_13.
- 33  
34

## 1 **Figure legends**

### 2 **Figure 1. Alleles of *RPA190* and *RPA135* suppress the growth defect of the *rpa49Δ***

3 **mutant at various levels.** (A) The *SGR1* mutant restores growth of the *rpa49Δ* mutant. Ten-

4 fold serial dilutions of wild-type (WT), *rpa49Δ* single mutant, *SGR1* single mutant, and

5 *SGR1/rpa49Δ* double mutant strains were spotted on rich media to assess growth at 30 and

6 25°C for three days. (B) Ten-fold dilutions of WT and *rpa49Δ* compared to *rpa49Δ* carrying

7 various plasmids: pGL190\_3 (*RPA190-E1274K*), pGL190\_11 (*RPA190-C1493R*),

8 pGL190\_23 (*RPA190-L1262P*), pGL135\_6prim (*RPA135-R379G*), pGL135\_54 (*RPA135-*

9 *Y252H*), or pGL135\_33 (*RPA135-F301S*). Growth was evaluated after three days at 25°C.

10 The strains and plasmids used are listed in S2-S3 Tables, respectively.

### 11 **Figure 2. Mapping of the modified residues in Rpa190, Rpa135 on the structure of Pol I**

12 **and isolation of Rpa12 alleles.** (A) Two different views of the initially transcribing complex

13 model and its 14 different subunits (PDB 5W66[15]). (B) Most mutated suppressor residues

14 are clustered at the interface between the jaw (Rpa190, blue) and lobe (Rpa135, salmon)

15 modules of Pol I. Note that residues 46- 51 in Rpa12 (yellow) are part of this interface. (C)

16 Zoom views of the areas containing the modified residues (Rpa190-N863, -S1259, -L1262, -

17 E1274, -C1493; Rpa135-Y252, D299, S300, F301, R305; and Rpa12-S6, T49) shown in

18 panel B. The figure was prepared with Pymol using the crystal structure of Pol I PDB 4C3I

19 [4]). (D) Ten-fold dilutions of the *rpa49Δ* mutant carrying various plasmids: an empty

20 pRS316 plasmid (-) YCp50-26 bearing *RPA49* (*RPA49*), pRS316-A12-S6L (*RPA12-S6L*), or

21 pRS316-A12-T49A (*RPA12-T49A*). Growth was evaluated after three days at 25°C or two

22 days at 30°C.

### 23 **Figure 3. *RPA135-F301S* and *RPA12-S6L* alleles restore growth and rRNA synthesis,**

24 **and modulate Pol I occupancy of rDNA genes in the absence of Rpa49Ct.** (A) Doubling

1 times of WT, *rpa49ΔCt*, *RPA135-F301S*, *rpa49ΔCt/RPA135-F301S* double mutant, *RPA12-*  
2 *S6L*, and the *rpa49ΔCt/RPA12-S6L* double mutant in a low rDNA copy number background  
3 (see S2 Table). (B) *In vivo* labelling of newly synthesized RNAs. WT (lane 1), *rpa49ΔCt*  
4 (lanes 2-4), *RPA135-F301S* (lane 5), the *rpa49ΔCt/RPA135-F301S* double mutant (lane 6),  
5 *RPA12-S6L* (Lane 7), the *rpa49ΔCt/RPA12-S6L* double mutant (lane 8) were grown to an  
6 OD<sub>600</sub> of 0.8. Cells were then pulse-labeled with [8-<sup>3</sup>H] adenine for 2 min. Samples were  
7 collected, and total RNA extracted and separated by gel electrophoresis. (C) Representative  
8 Miller spreads of WT, *rpa49ΔCt*, *RPA135-F301S*, *rpa49ΔCt/RPA135-F301S*, and  
9 *rpa49ΔCt/RPA12-S6L* double mutant. Panels on the right of each micrograph show  
10 interpretive tracing of the genes. Polymerases that appear on the gene are shown on the  
11 tracing by black dots. The number of polymerases counted on the genes is indicated below. N  
12 represents the number of individual spread genes used for quantification (see Materials and  
13 Methods). Scale bar = 200 nm. (D) ChIP analysis of Pol I occupancy at rDNA. Strains  
14 bearing WT Pol I, expressing Rpa49 lacking its C-terminal part (*rpa49ΔCt*), bearing  
15 suppressor mutation (*RPA135-F301S*) or double mutant, were subjected to ChIP experiments  
16 using TAP tagged Rpa135, as described in Materials and Methods. Experiments were  
17 reproduced three times, representative Pol I occupancy relative to WT level are shown.  
18 Position of qPCR amplicons are depicted on rDNA unit. \*\* Marks significantly different  
19 values (p-values > 0.01) in student's test of *rpa49ΔCt* with WT, *RPA135-F301S* and double  
20 *rpa49ΔCt RPA135-F301S*.

21  
22 **Figure 4. Rpa14, Rpa34, and the DNA mimicking loop of Rpa190 are not required for**  
23 **suppression.** Deletion of the DNA mimicking loop of Rpa190 (A) or *RPA34* (B) does not  
24 modulate the suppression activity of *RPA135-F301S*. (C) *RPA135-F301S* suppresses the

1 synthetic lethality between *rpa14Δ* and *rpa49Δ*. Ten-fold serial dilutions were performed and  
2 growth evaluated after three days at 25°C.

3 **Figure 5. *RPA12* alleles can modulate the *rpa49Δ*-associated growth defect.** (A) Growth of  
4 the double mutants: *rpa49Δ rpa12ΔCt*, or *rpa49Δ* combined with full depletion of *rpa12*.  
5 Depletion of Rpa12 was achieved using a *pGAL-RPA12* construct on glucose containing  
6 medium (strain OGT30-1c). Ten-fold serial dilutions of OGT30-1c bearing pRS316-A12  
7 (WT), pRS316-A12-DCt expressing Rpa12 bearing a C-terminal deletion of residues 65-125  
8 (*rpa12ΔCt*), or an empty plasmid pRS316 (*-rpa12*) were seeded onto media. The growth of  
9 *rpa49Δ* combined with *RPA12* depletion was tested using strain OGT30-3c bearing pRS316-  
10 A12 (*rpa49Δ*), pRS316-A12-DCt (*rpa12ΔCt rpa49Δ*), or an empty plasmid pRS316 (*-rpa12*  
11 *rpa49Δ*). Growth was assessed after four days at 25°C or 30°C. (B) The C terminus of Rpa12  
12 is not required for suppression. Ten-fold serial dilutions of OGT30-1c (*RPA49*-WT), bearing  
13 pRS316-A12 (WT) or pRS316-A12-DCter (*rpa12ΔCt*), and OGT30-3c (*rpa49Δ*), bearing  
14 pRS316-A12 (WT), pRS316-A12-DCter (*rpa12ΔCt*), pRS316-A12-S6L (*RPA12-S6L*), or  
15 pTD10 (*RPA12-S6L-ΔCt*) were seeded onto media. Growth was assessed after four days at  
16 25°C. (C) Suppression activity of *RPA135-F301S* is abolished in the absence of Rpa12.  
17 *RPA12*, under a regulatable promoter (*pGAL*) was either expressed (*+RPA12*; left panel) on  
18 galactose containing medium or repressed (*-RPA12*; right panel) on glucose containing  
19 medium. Ten-fold serial dilutions of *RPA49*, *rpa49Δ*, *RPA49*, *RPA135-F301S*, or *rpa49Δ*  
20 *RPA135-F301S* were grown at 25°C. Depletion of *RPA12* abolishes the suppression activity  
21 of *RPA135-F301S* (compare the left to the middle and right panels). Extended incubation  
22 (right panel, 10 days) was used to detect growth of the double mutant *-RPA12 rpa49Δ* on  
23 plates.

24 **Figure 6. *In vitro* transcription assays of WT Pol I and Pol I mutants.** WT, Pol A\* (lacking  
25 Rpa34 and Rpa49), Pol I bearing Rpa135-F301S, and Pol A\* bearing Rpa135-F301S were

1 affinity-purified and 5 nM of each enzyme was used in either promoter dependent (A) or  
2 tailed template assay (B). Promoter-dependent assays were performed in the presence of 70  
3 nM Rrn3 and 20 nM CF. Radiolabelled transcripts were separated on a denaturing  
4 polyacrylamide/urea gel and detected using a PhosphorImager. Note that upper radiolabeled  
5 bands in the experiment analyzing promoter-dependent transcription are due to nonspecific  
6 background labelling. Experiments were reproduced at least three times, with different Pol I  
7 concentration; representative experiments is shown.

8

9 **Figure 7. *RPA135-F301S* led to over-production of rRNA *in vivo*.** (A) WT, *RPA135-F301S*, *rrp6Δ*  
10 and *RPA135-F301SΔ rrp6Δ* strains were grown to mid-log phase in glucose containing media. Cell  
11 samples were collected and total RNAs were extracted, separated by gel electrophoresis and  
12 transferred to a nylon membrane. The accumulation of the different (pre-) rRNAs was then analyzed  
13 by northern blot using different probes (see Materials and Methods). (B) *In vivo* labelling of newly-  
14 synthesized RNAs. WT, *RPA135-F301S*, *rrp6Δ* and *RPA135-F301SΔ rrp6Δ* strains were grown to an  
15 OD<sub>600</sub> of 0.8. Cells were then pulse-labeled with [8-<sup>3</sup>H] adenine for 40 seconds. Samples were  
16 collected, and total RNA extracted and separated by gel electrophoresis. Newly-synthesized RNA are  
17 revealed by autoradiography, loading control was performed by northern blot (*PGKI* mRNA probe –  
18 1831) on the same membrane. (C) High-resolution transcriptional run-on (TRO) analysis of WT,  
19 *RPA135-F301S*, *rrp6Δ* and *RPA135-F301SΔ rrp6Δ* strains. Nascent transcripts were labelled, and  
20 revealed using antisens oligonucleotides immobilized on slot-blot as described in Materials and  
21 Methods. Each experiment was performed twice; a representative example is shown in the lower left  
22 panel. NTS2, Pol I (mean of 5'ETS, 18S.2, 25S.1, 3' ETS) are quantified relative to 5S signal in the  
23 lower right panel. Yeast rDNA unit is represented in the upper panel, with the position of the  
24 corresponding antisense oligonucleotides used.

25

26 **Figure 8. Schematic representation of Pol I.** (A) Free monomeric Pol I with mobile  
27 Rpa49Ct and linker. (B) Initially transcribing complex (ITC) upon insertion of melted DNA

1 in the presence of Rpa49 (purple). Rpa49Ct interacts with upstream DNA and the Rpa49-  
2 linker is folded, closing the cleft (black anchor). Movements of Rpa12 and the jaw with  
3 respect to the lobe are indicated with arrows. (C) Pol I lacking Rpa49 is likely defective in  
4 stabilizing the closed conformation in the DNA-binding cleft, resulting in a looser gripping of  
5 DNA inside the cleft (red asterisks). (D) Suppressor mutations (green) facilitate movement of  
6 the jaw/lobe interface and gripping of the DNA by the Pol I enzyme (red arrow), in the  
7 absence of Rpa49. (E) Combination of the presence of Rpa49 and a suppressor mutation  
8 (green dot) results in a super-active Pol I compared to the WT enzyme.  
9  
10

## 1 **Supporting information captions**

2

### 3 **S1 Fig: Genetic interaction mapping (GIM) to identify suppressor mutations in SGR1**

4 **and SGR2.** (A) Schematic representation of GIM interaction assay. Enrichment ratios  
5 between control and SGR are used as read-out to map genetic interactions. (B) Relative  
6 enrichment of each barcode (black cross) along chromosome (in red) is used to map genetic  
7 linkage. Green curve represents mean in a sliding windows of 20 barcodes. Local maximum  
8 in such curve was used to identify locus of interest: RPA49 as positive control (upper panel,  
9 chr 14); RPA135 in SGR1 (middle panel, chr 16) ; RPA190 in SGR2 (lower panel, chr 15).

10

### 11 **S2 Fig: Mapping of the mutated residues in Rpa135.** (A) Structural domains of Rpa135 are

12 depicted [4,5], including the lobe domain in which mutations are clustered. (B) Sequences  
13 alignment of positions 251-310 of Rpa135 from *S. cerevisiae* (NP\_015335.1), compared with  
14 *S. pombe* (NP\_595819.2), *H. sapiens* (NP\_061887.2) , *M. musculus* (NP\_033112.2) , *D. rerio*  
15 (NP\_956812.2), *D. melanogaster* (NP\_476708.1) and *C. elegans* (NP\_492476.1 ). Color code  
16 from light to dark blue indicates residue conservations. Mutated residues at position 252 (Y to  
17 H), 299 (D to G), 300 (S to F), 301 (F to S or L) and 305 (R to L) are depicted in red.

18

### 19 **S3 Fig: Analysis of the rDNA size by pulse field gel electrophoresis.** Chromosomes from

20 indicated strains (same as in Fig. 3D, two clones) were separated on the agarose gel and  
21 analysed by Southern blot using rDNA-specific probe.

22

### 23 **S4 Fig: Promoter dependent *in vitro* transcription assays of Pol A\* (lacking Rpa34 and**

24 **Rpa49) and Pol A\* bearing Rpa135-F301S are complemented with recombinant A34.5/A49**  
25 **heterodimer. Promoter-dependent assays were performed as in fig. 6, with recombinant**  
26 **A49/A34.5 protein, described in [23].**

1

2 S5 Fig: Ten-fold serial dilutions of *WT*, *RPA135-F301S*, *rrp6Δ* and *RPA135-F301S -*

3 *rrp6Δ* grown at 25°C for 3 days.

4

5 **S1 Table:** List of 24 individual suppressor mutations of the growth defect of *rpa49Δ* strain in

6 the Rpa190, Rpa135, and Rpa12 subunits.

7

8 **S2 Table:** Yeast strains used in this study.

9

10 **S3 Table:** Plasmids used in this study.

11

12 **S4 Table:** Oligonucleotides used in this study.

13

14 **S1 Movie:** Conformational changes in Pol I upon initiation. The movie starts with the closed

15 cleft conformation (PDB 5W66 [15]), in which melted DNA occupies the cleft and then

16 changes to the intermediate cleft conformation observed in monomeric Pol I (PDB 5M3M

17 [35]). Relevant structural regions have been variously colored and labeled, and residues

18 mutated in this report are shown in red.

19

20



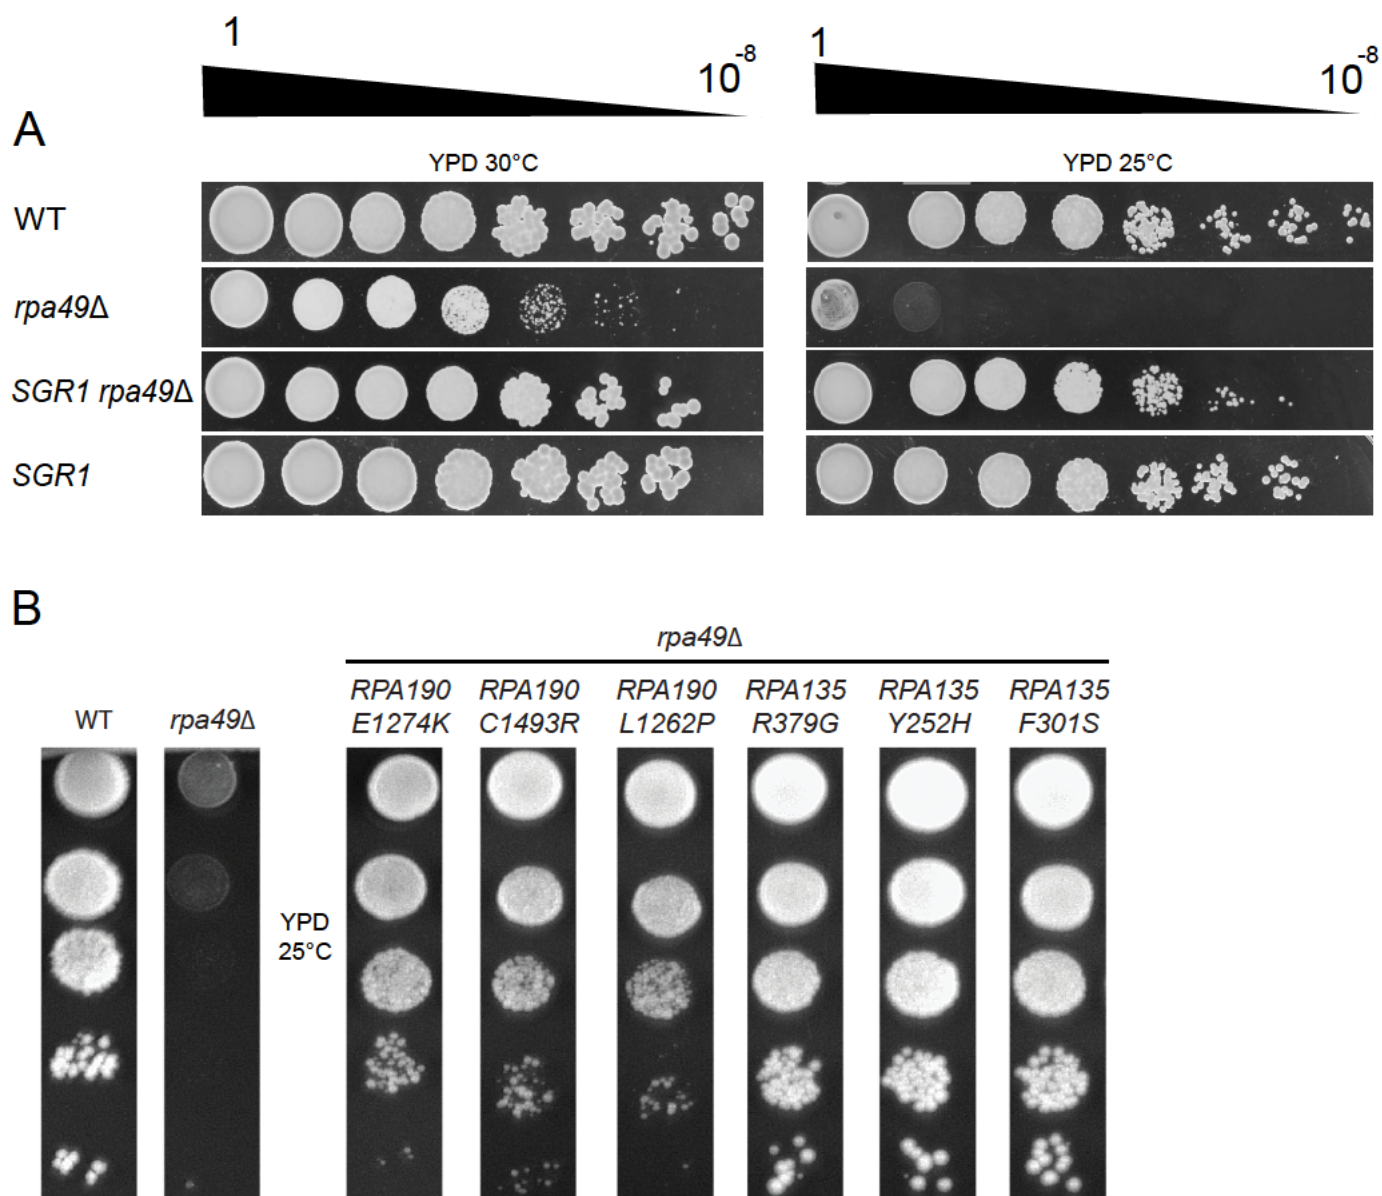

Figure 1

A

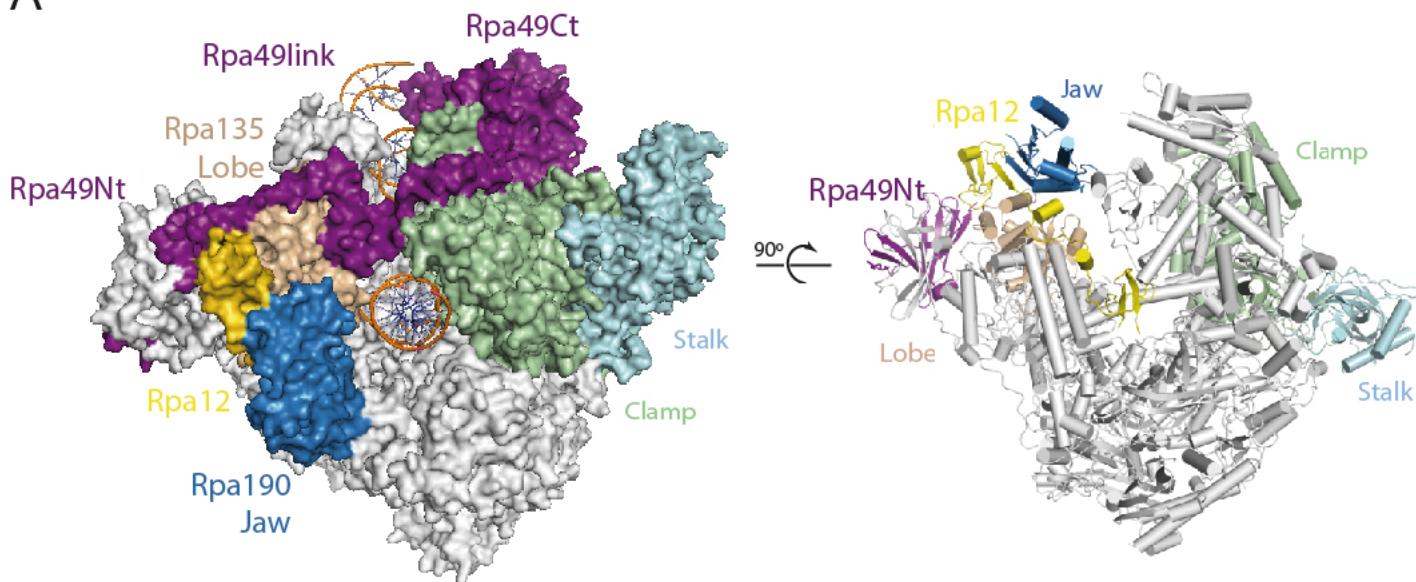

B

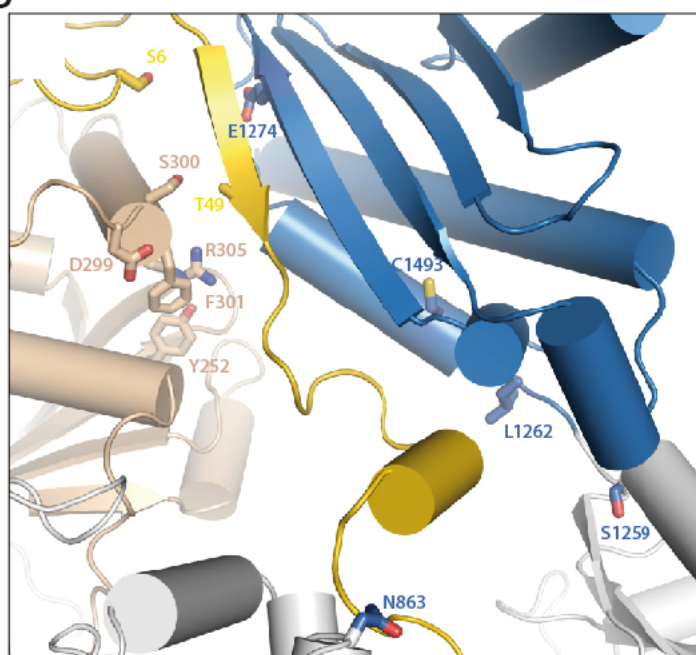

C

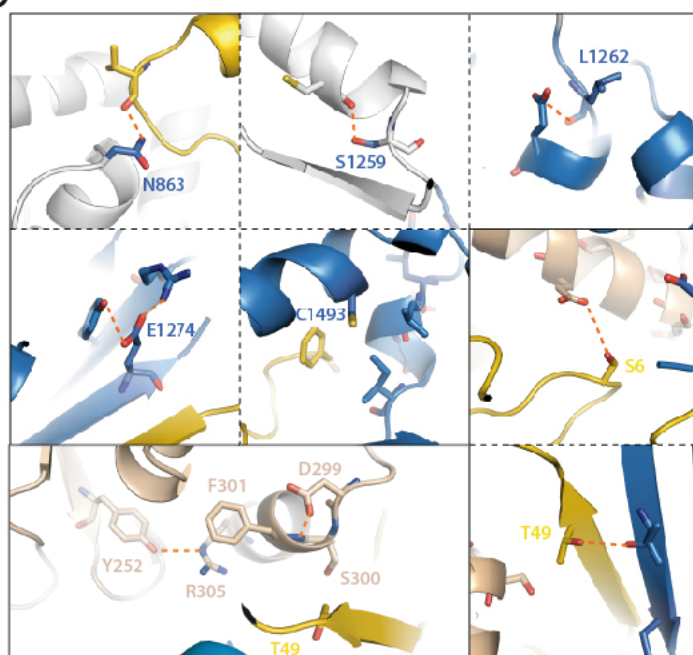

D

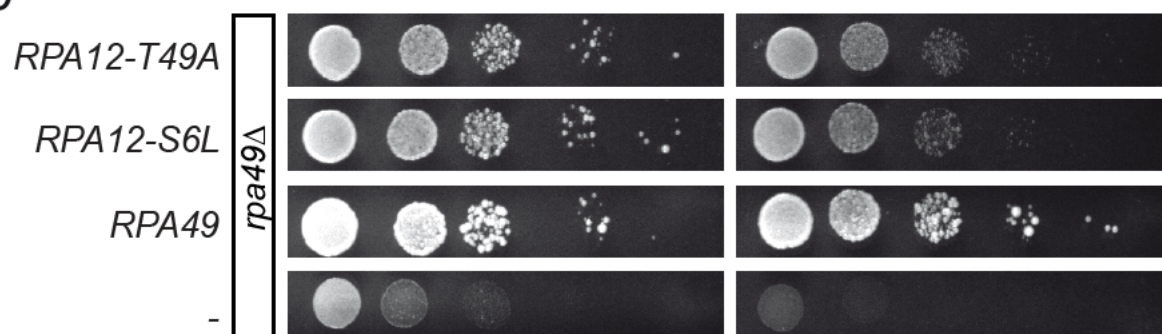

Figure 2

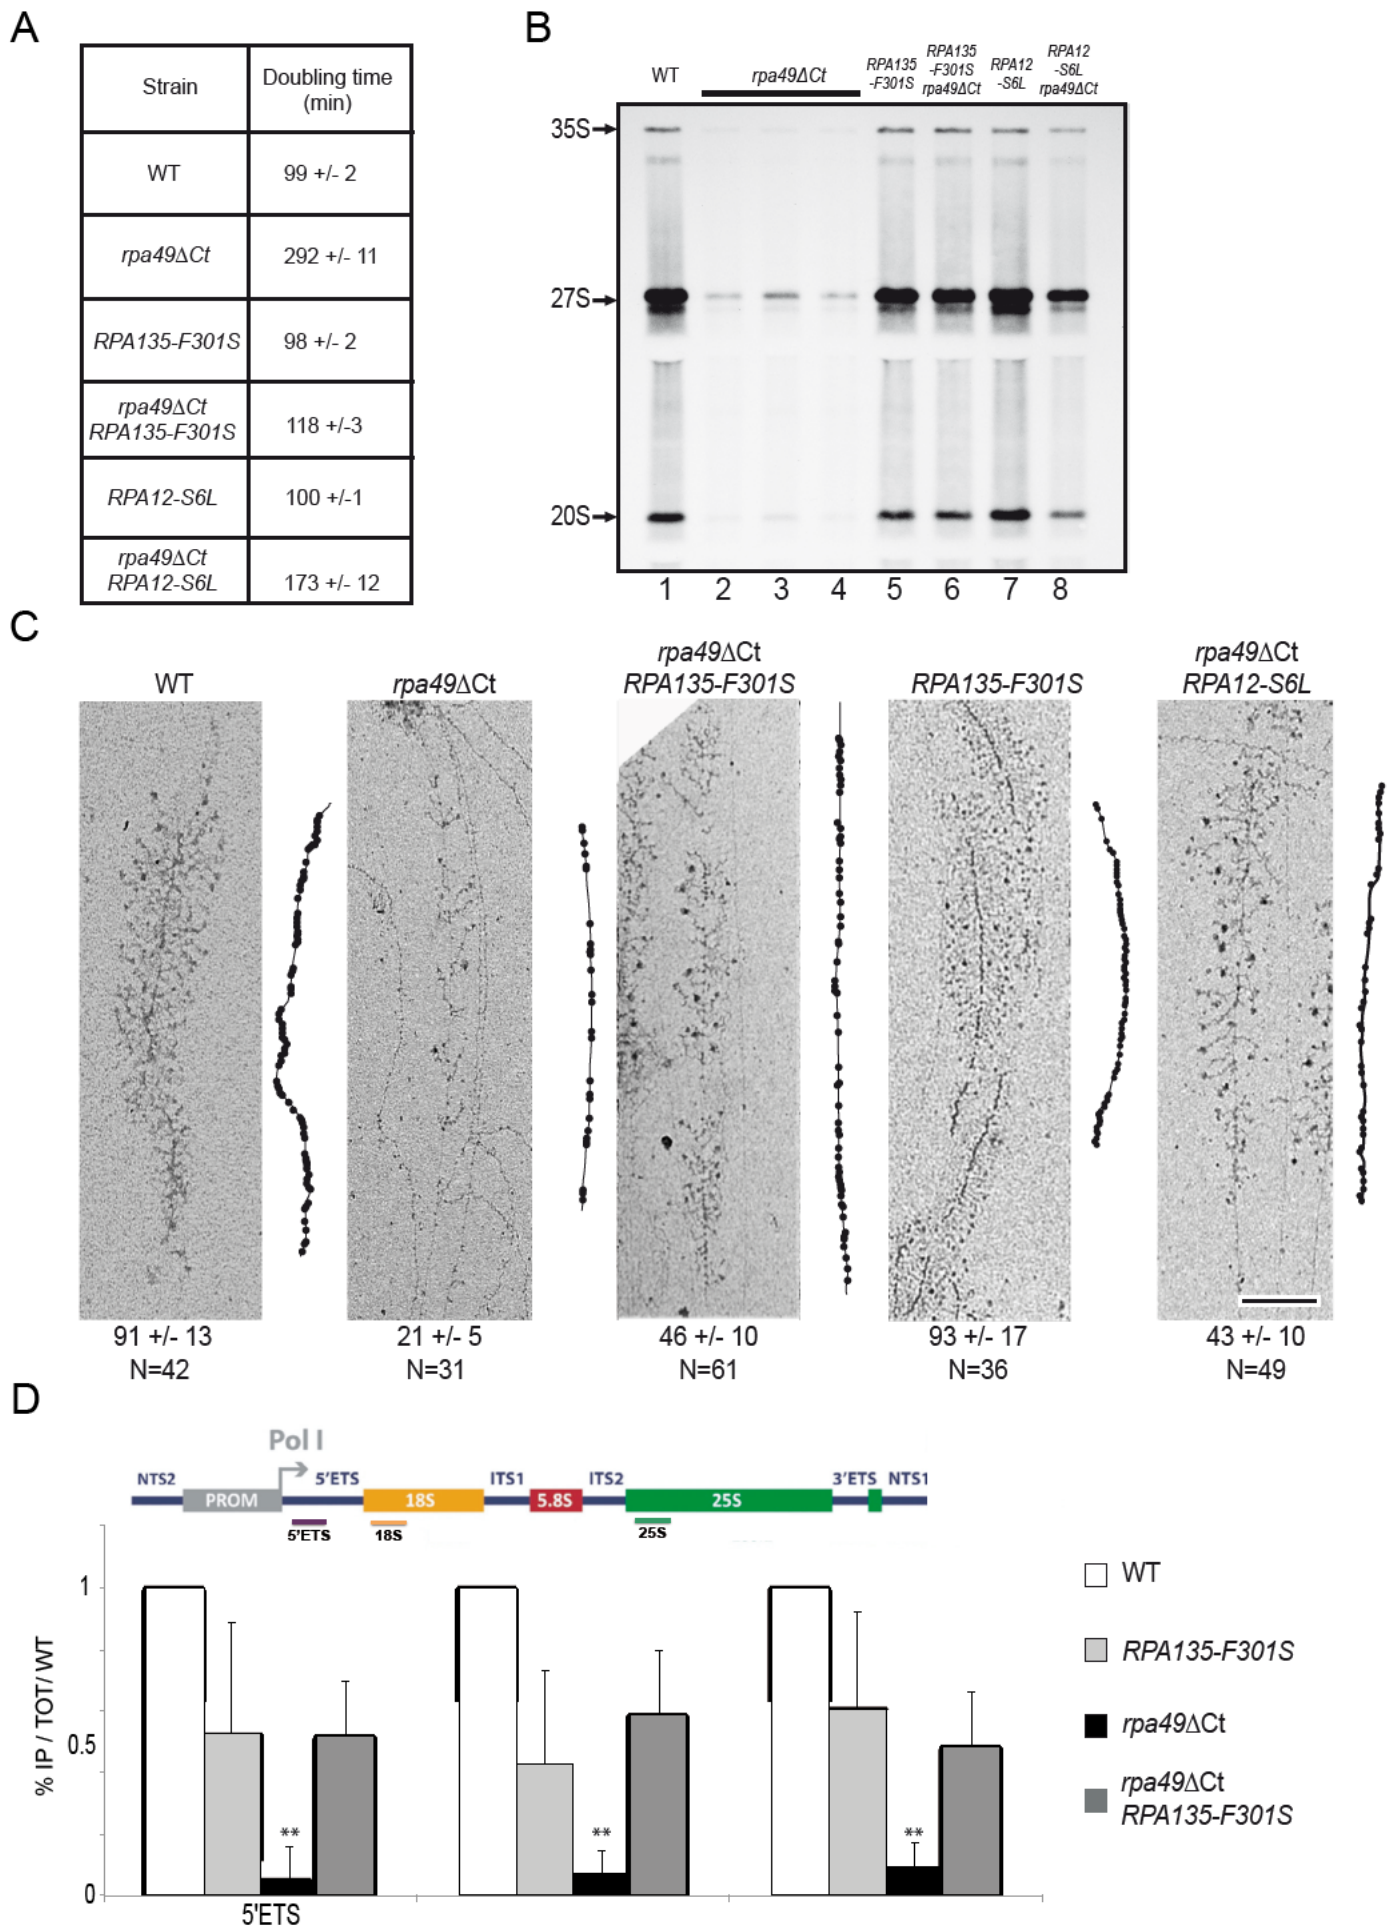

Figure 3

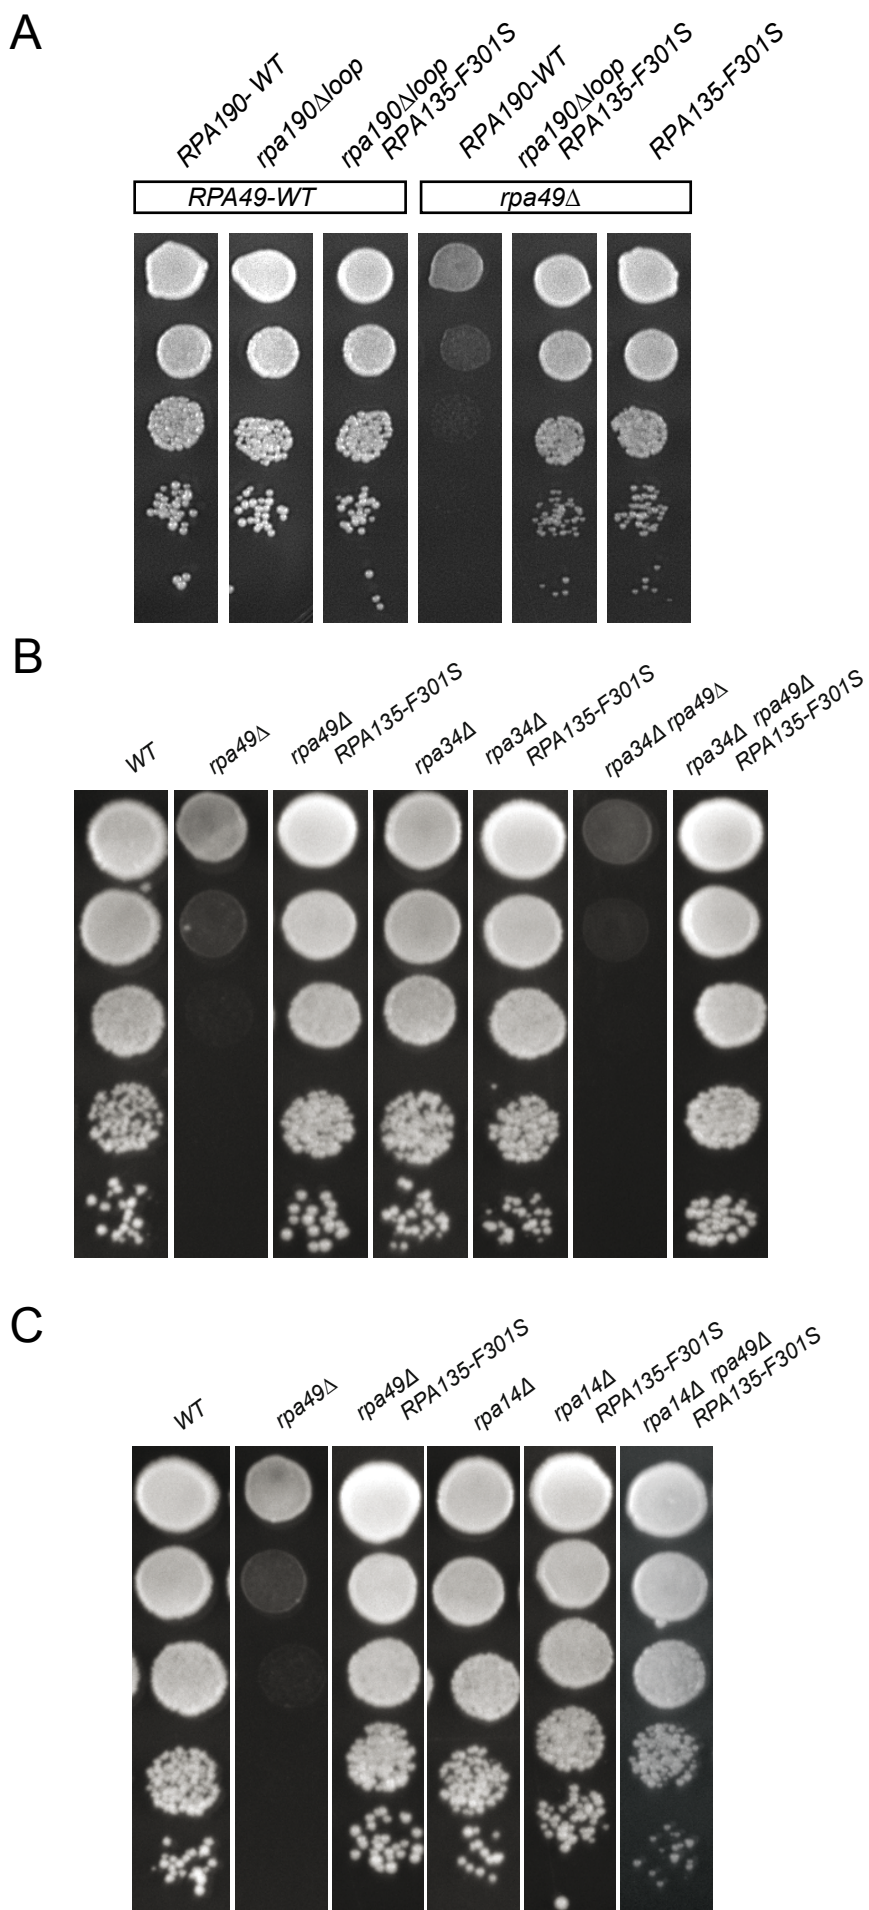

Figure 4

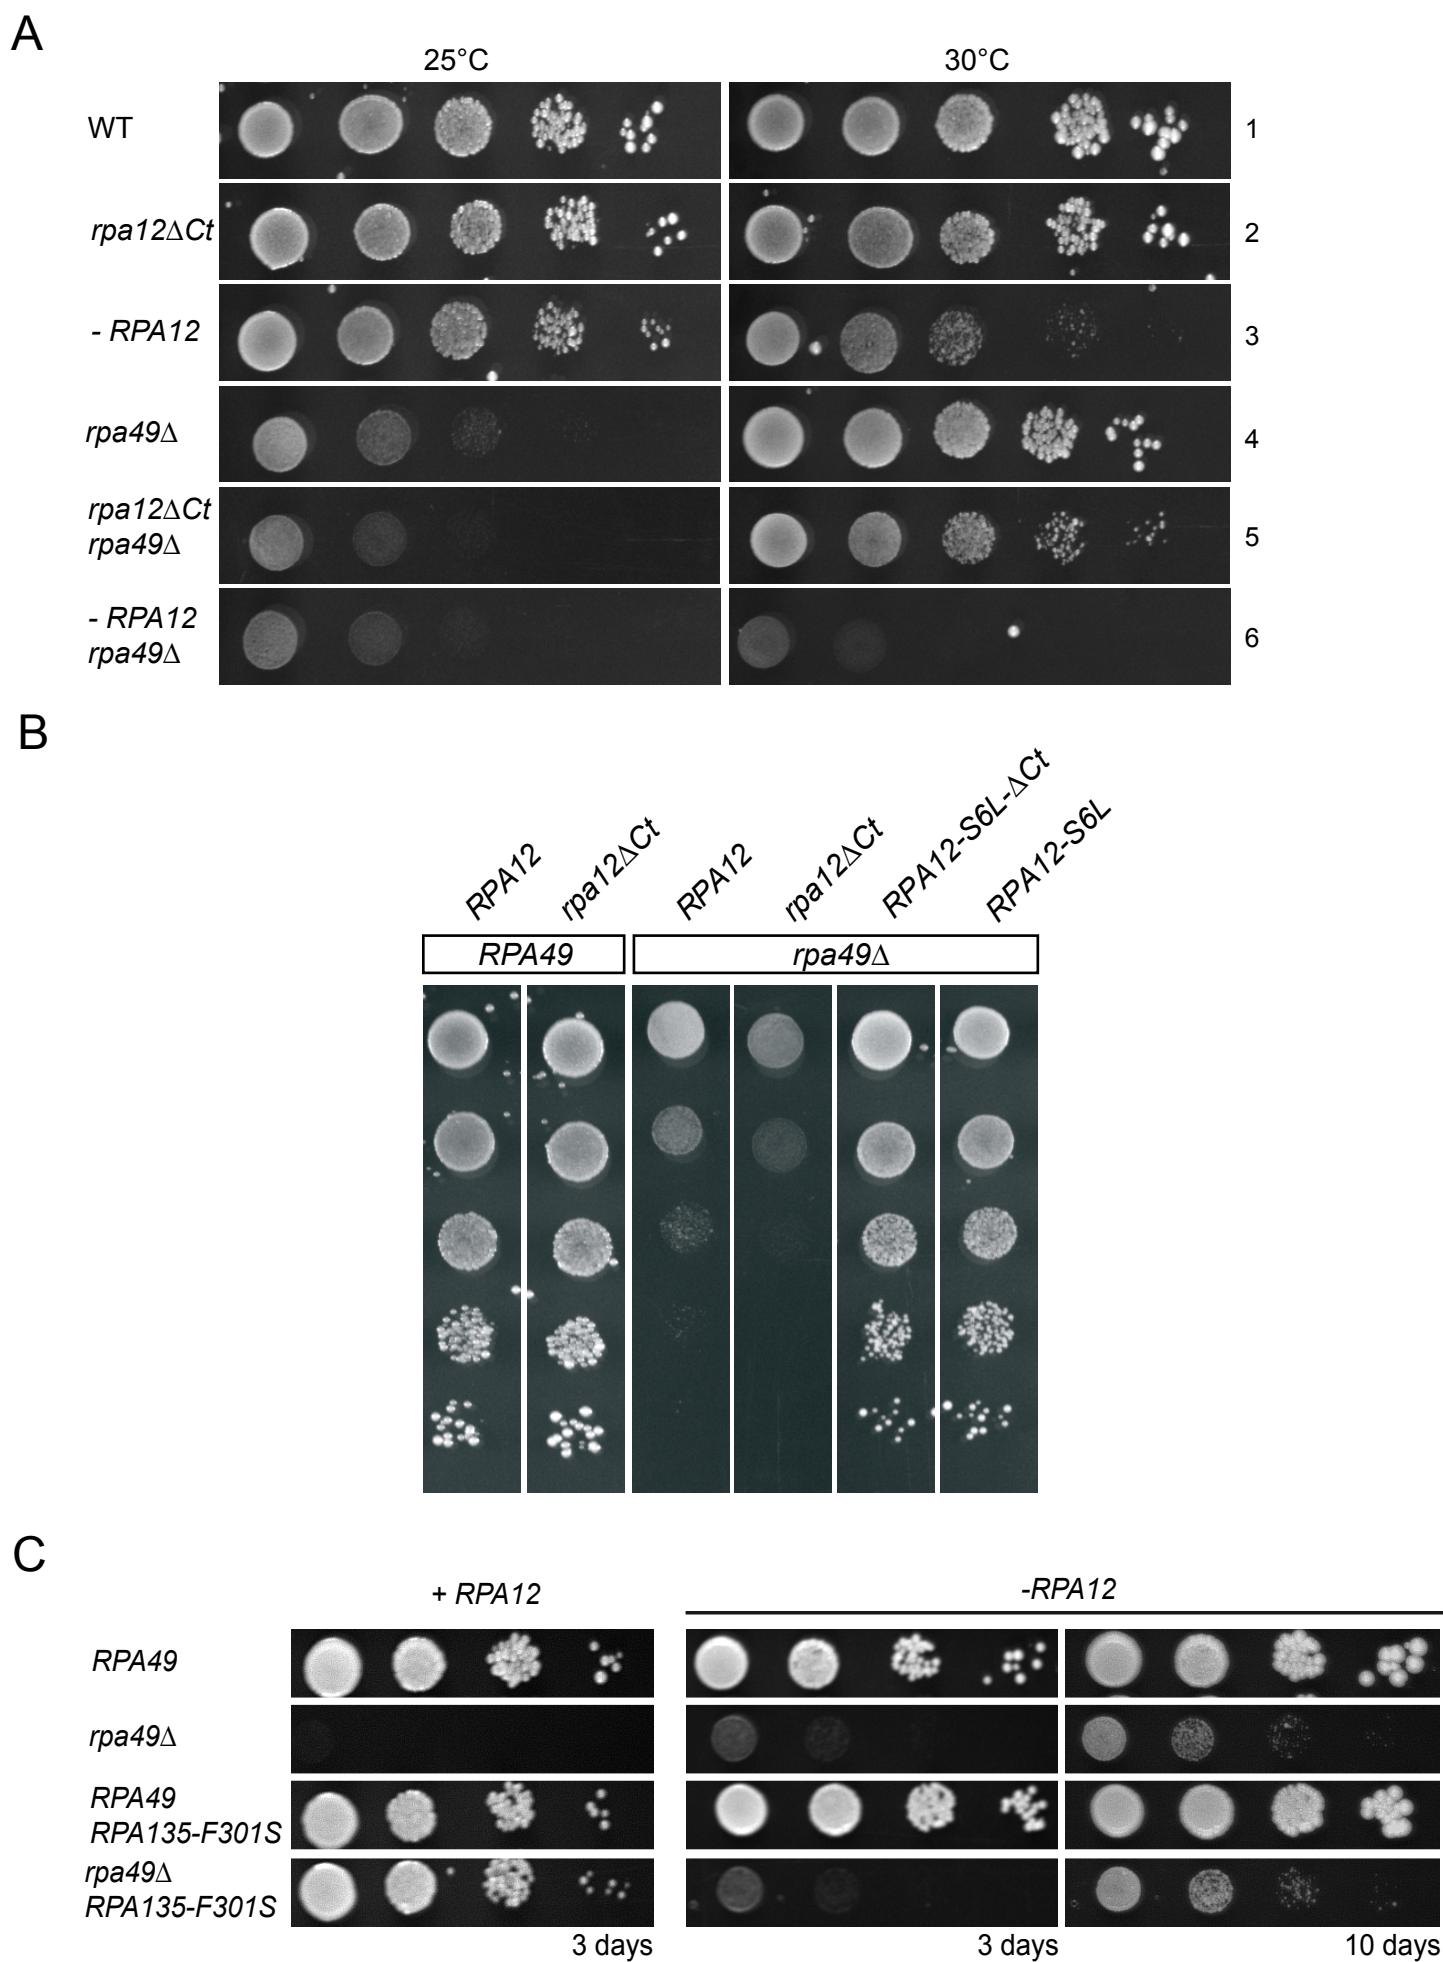

Figure 5

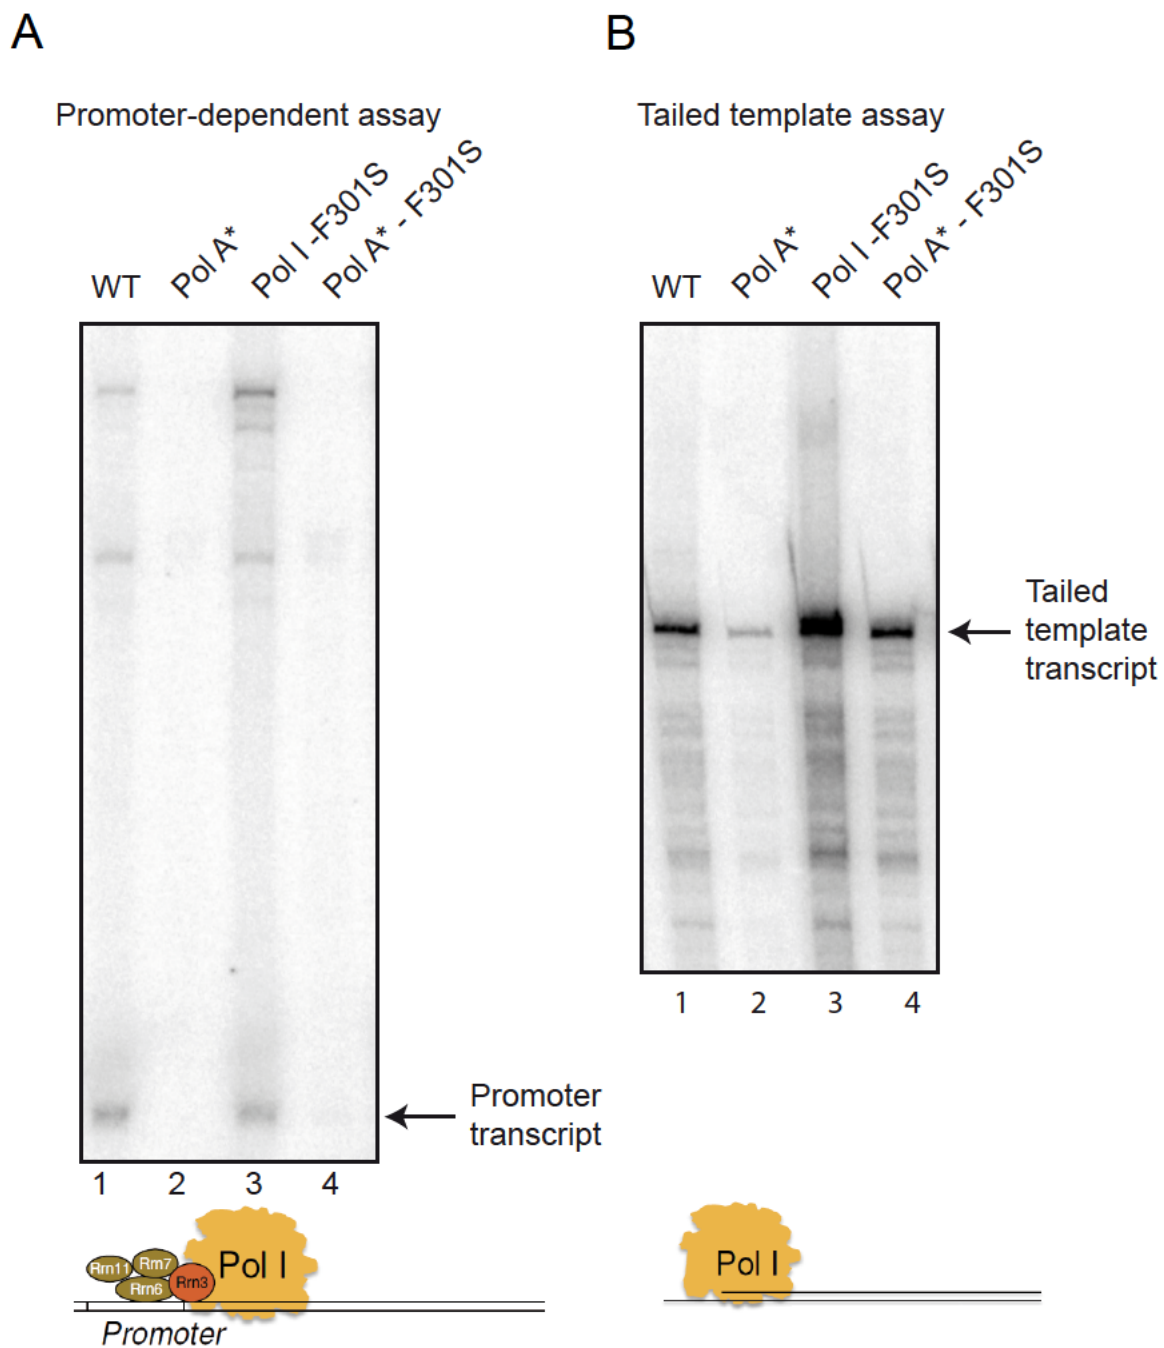

Figure 6

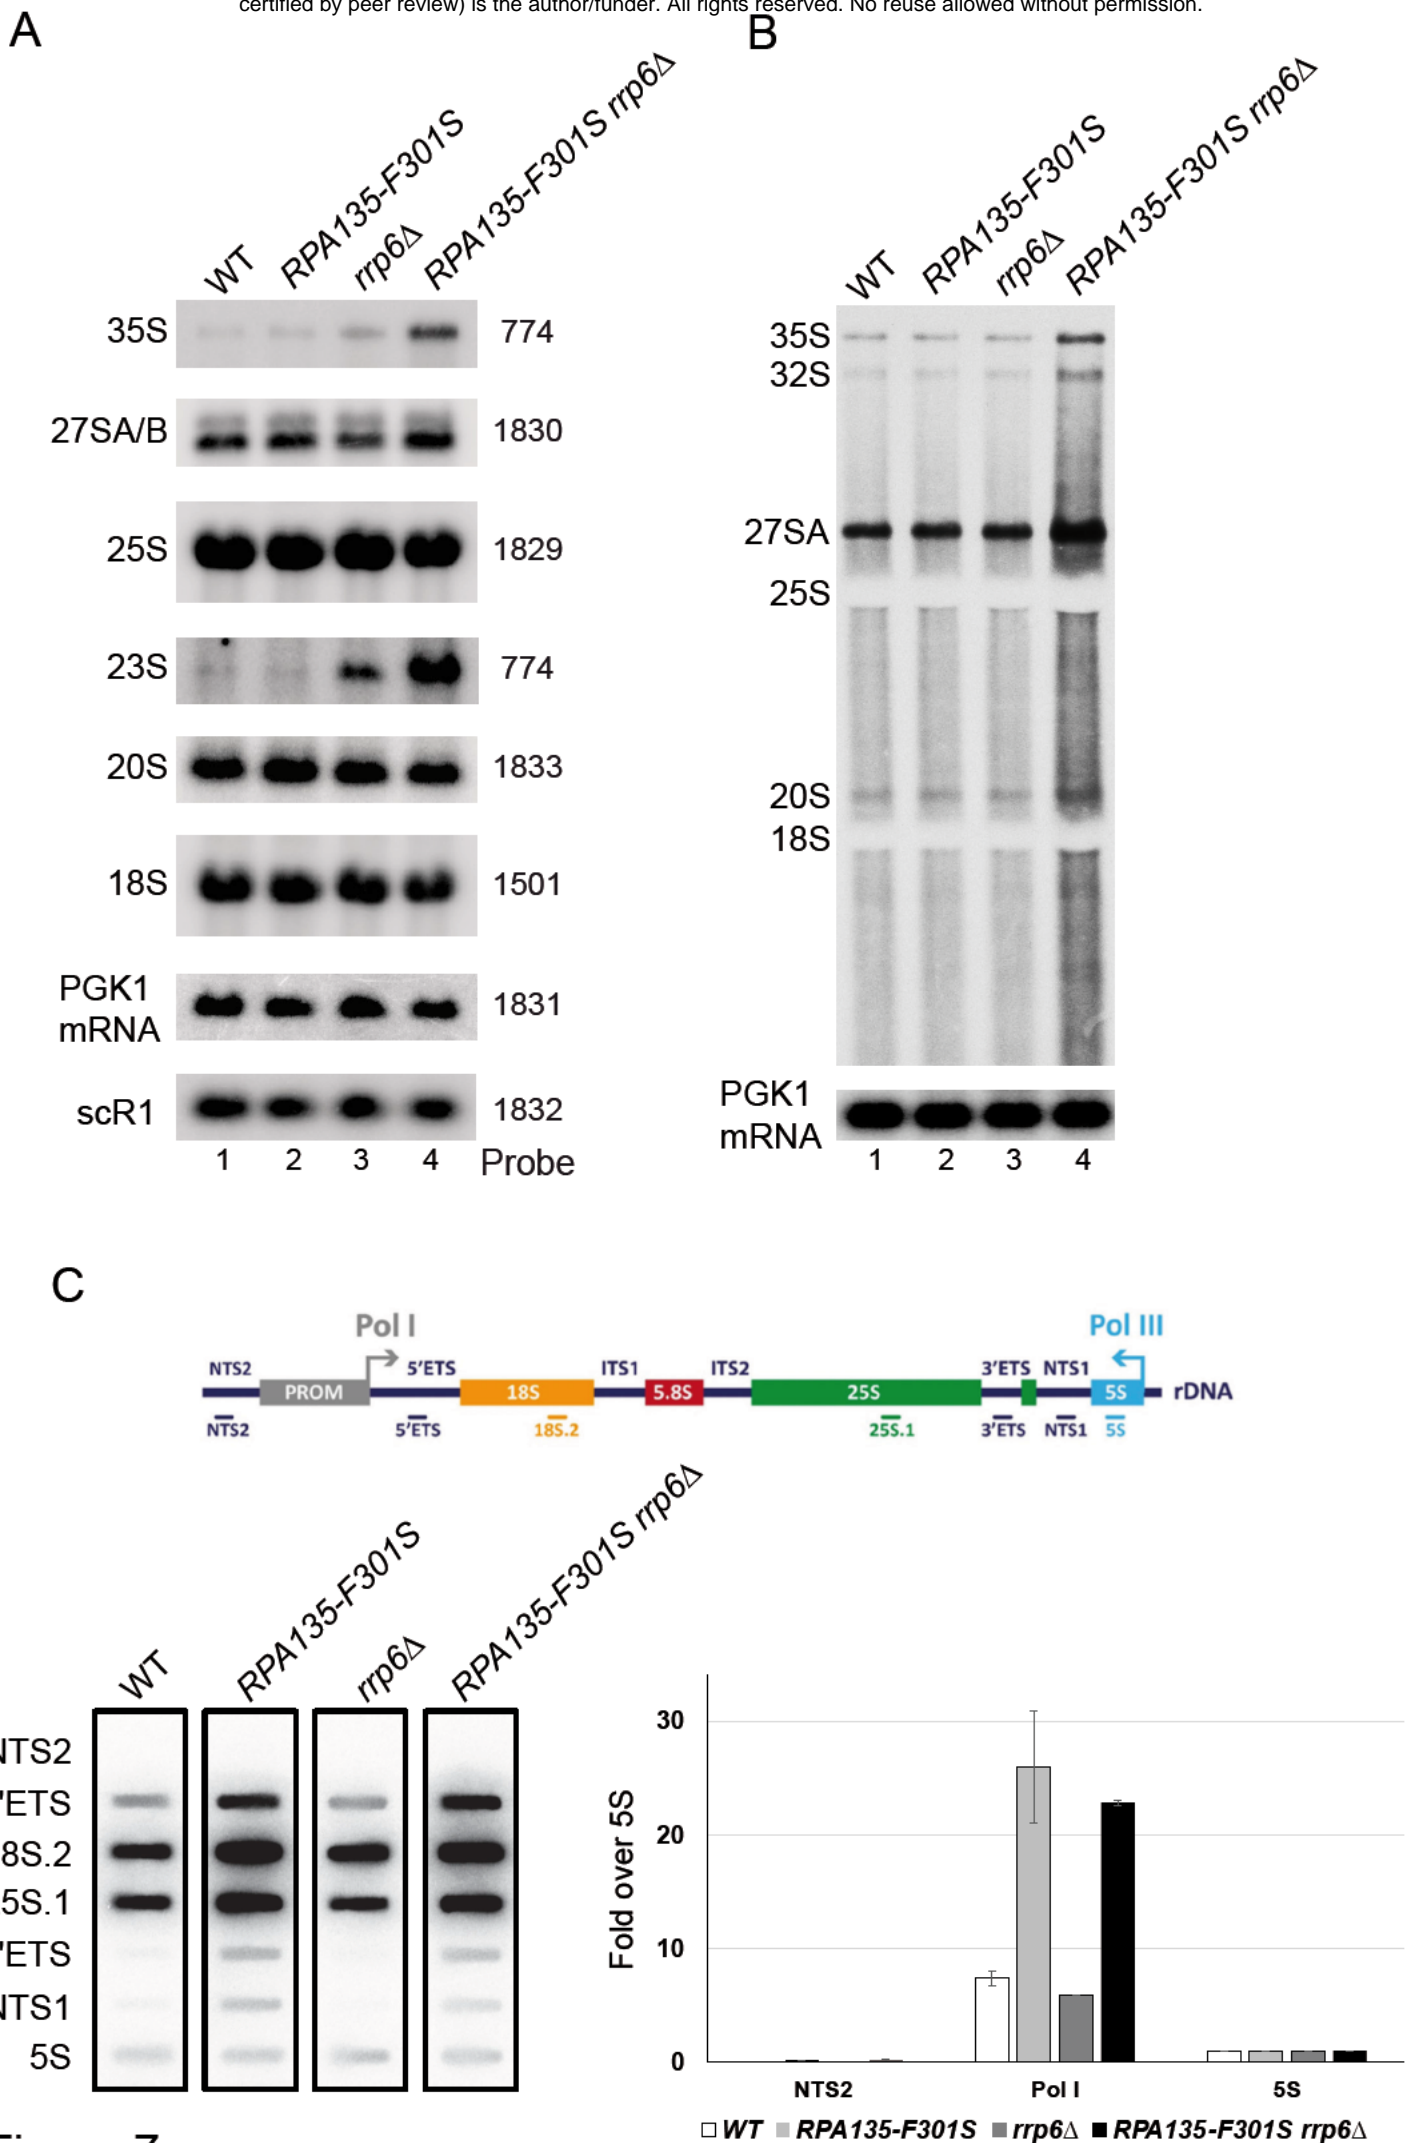

Figure 7

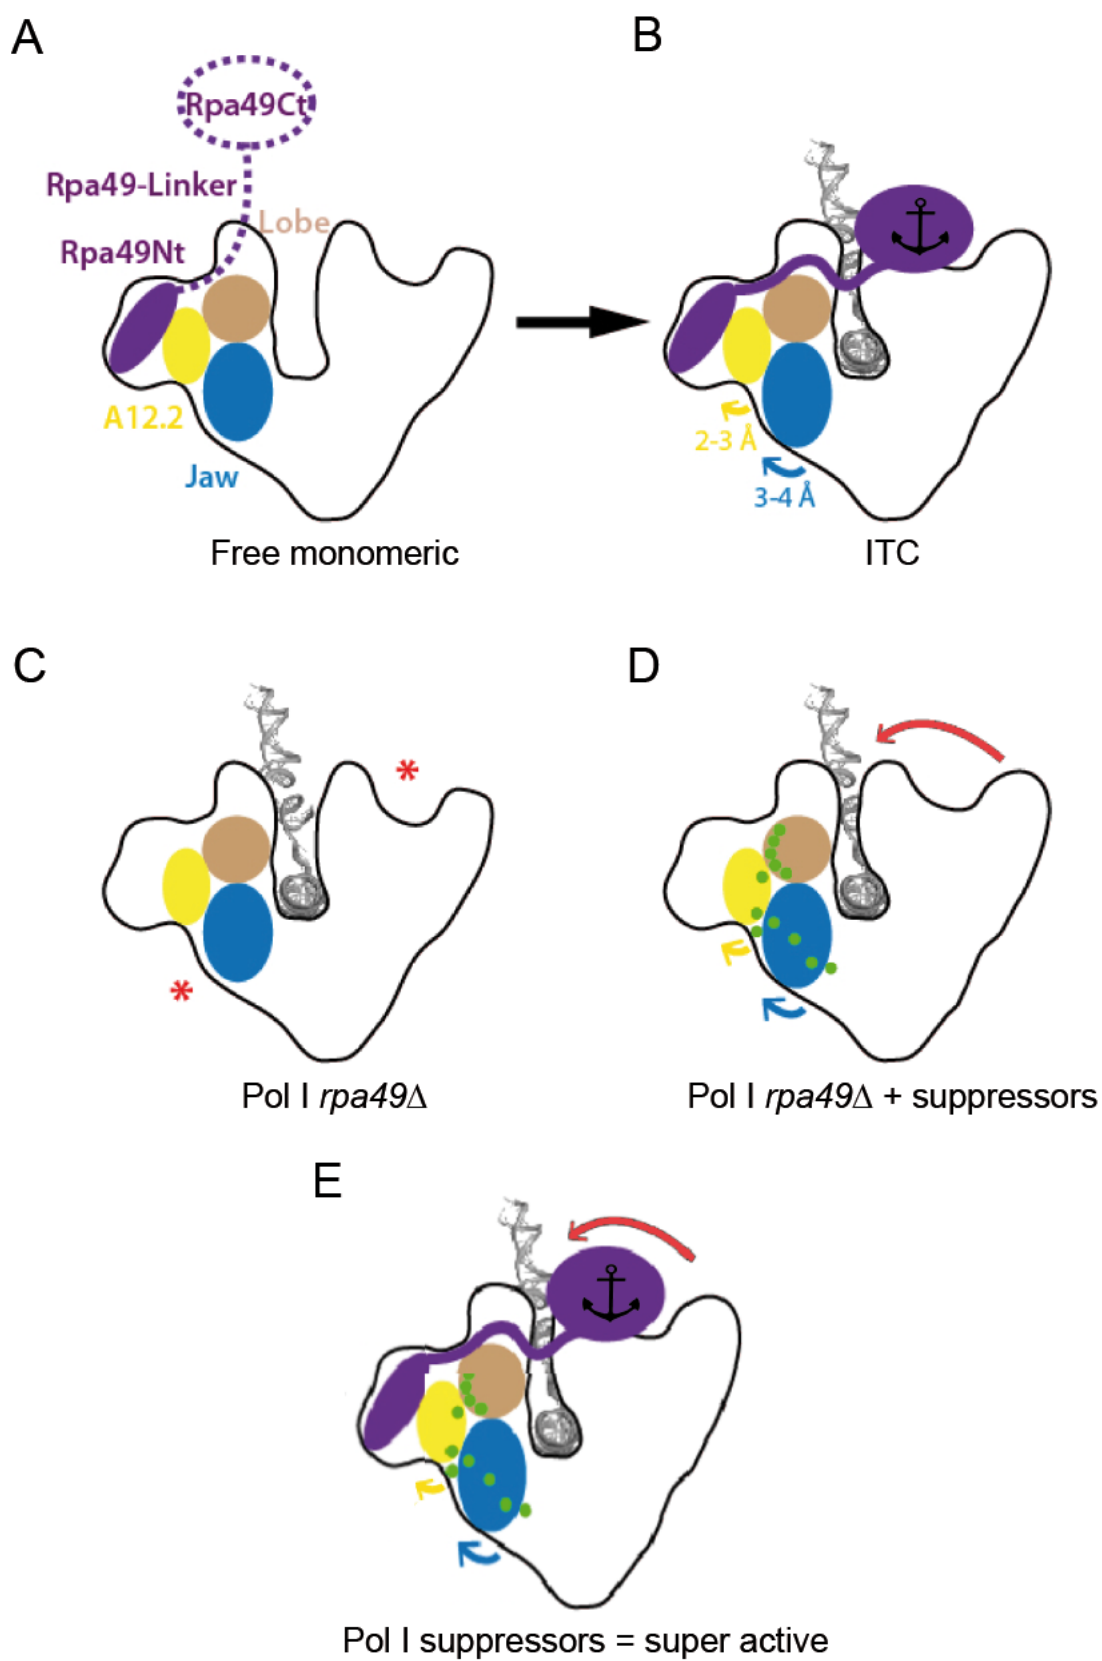

Figure 8
